# Supplementary material for: Design, Synthesis and Biological Assessment of Rhodanine-Linked Benzenesulfonamide Derivatives as Selective and Potent Human Carbonic Anhydrase Inhibitors
Source: MDPI journal article supplement (doi:10.3390/molecules27228028), 2022-11-18
Supplement: s1 [file s1]

## **Supporting information**

### **Design, synthesis and biological assessment of rhodanine-linked benzenesulfonamide derivatives as selective and potent human carbonic anhydrase inhibitors**

Baijayantimala Swain<sup>1</sup>, Abrar Khan<sup>1</sup>, Priti Singh<sup>1</sup>, Vaibhav S. Marde<sup>1</sup>, Andrea Angeli<sup>2</sup>, Krishna Kartheek Chinchilli<sup>1</sup>, Venkata Madhavi Yaddanapudi<sup>1</sup>, Simone Carradori<sup>3,\*</sup>, Claudiu T. Supuran<sup>2</sup> and Mohammed Arifuddin<sup>1,4</sup>

<sup>1</sup>Department of Chemical Sciences National Institute of Pharmaceutical Education and Research (NIPER), Balanagar, Hyderabad 500037, India

<sup>2</sup>Neurofarba Department, University of Florence, Via Ugo Schiff 6, 50019 Sesto Fiorentino, Florence, Italy

<sup>3</sup>Department of Pharmacy, “G. d’Annunzio” University of Chieti-Pescara, via dei Vestini 31, Chieti 66100, Italy

<sup>4</sup>Department of Chemistry, Directorate of Distance Education, Maulana Azad National Urdu University, Gachibowli, Hyderabad 500032, Telangana, India

**\*Correspondence:** Prof. Simone Carradori, [simone.carradori@unich.it](mailto:simone.carradori@unich.it)

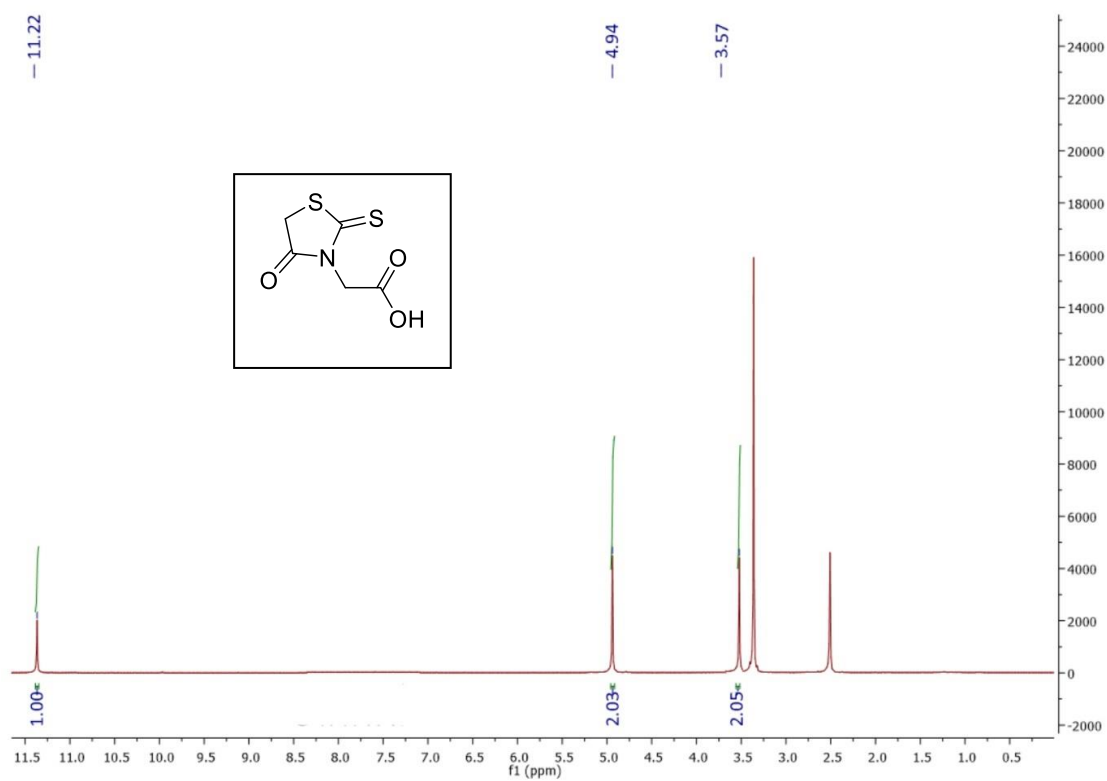

Figure S1. <sup>1</sup>H NMR of **3** in DMSO-*d*<sub>6</sub>

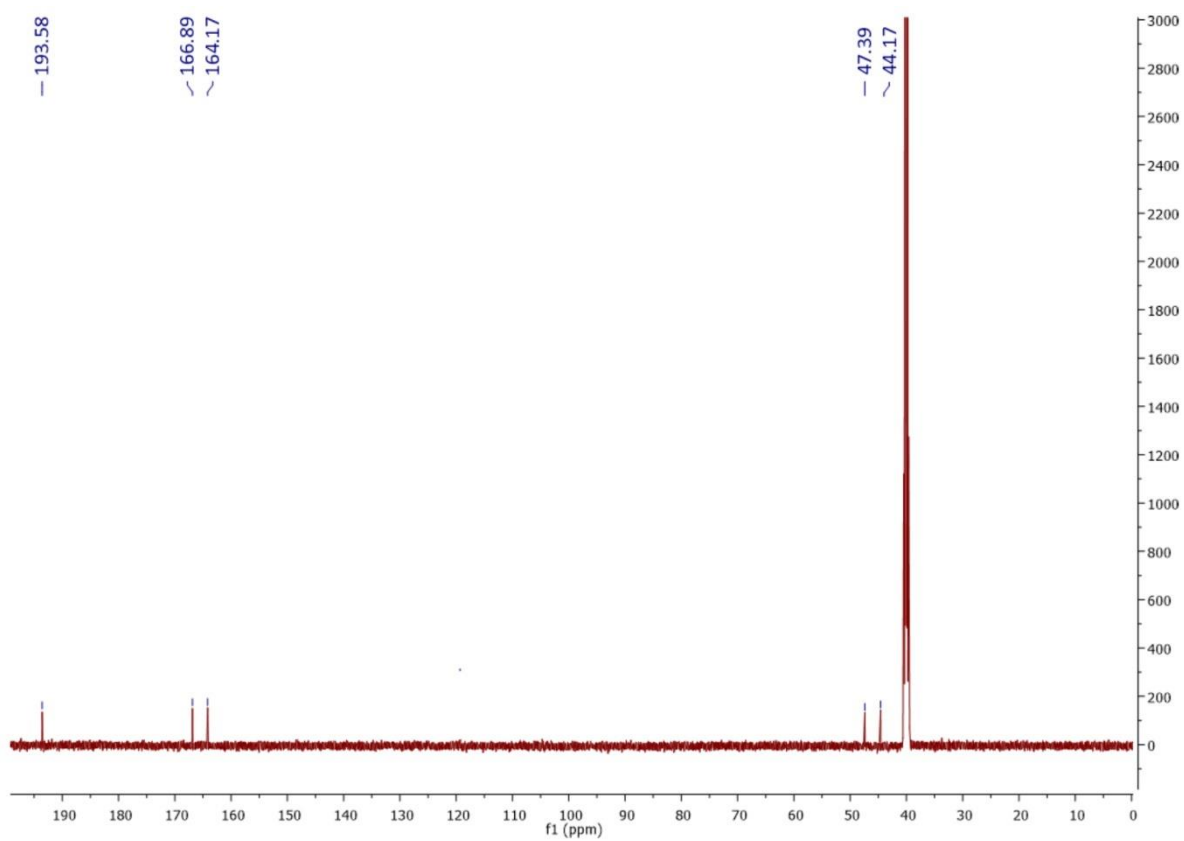

Figure S2. <sup>13</sup>C NMR of **3** in DMSO-*d*<sub>6</sub>

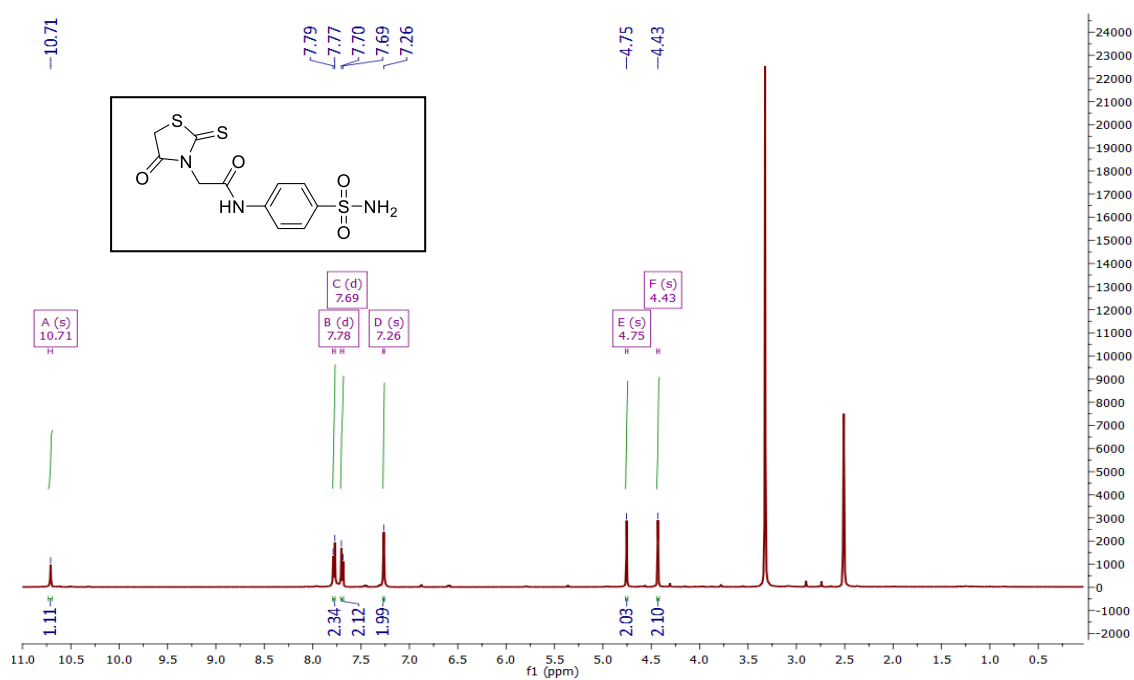

Figure S3. <sup>1</sup>H NMR of **5** in DMSO-*d*<sub>6</sub>

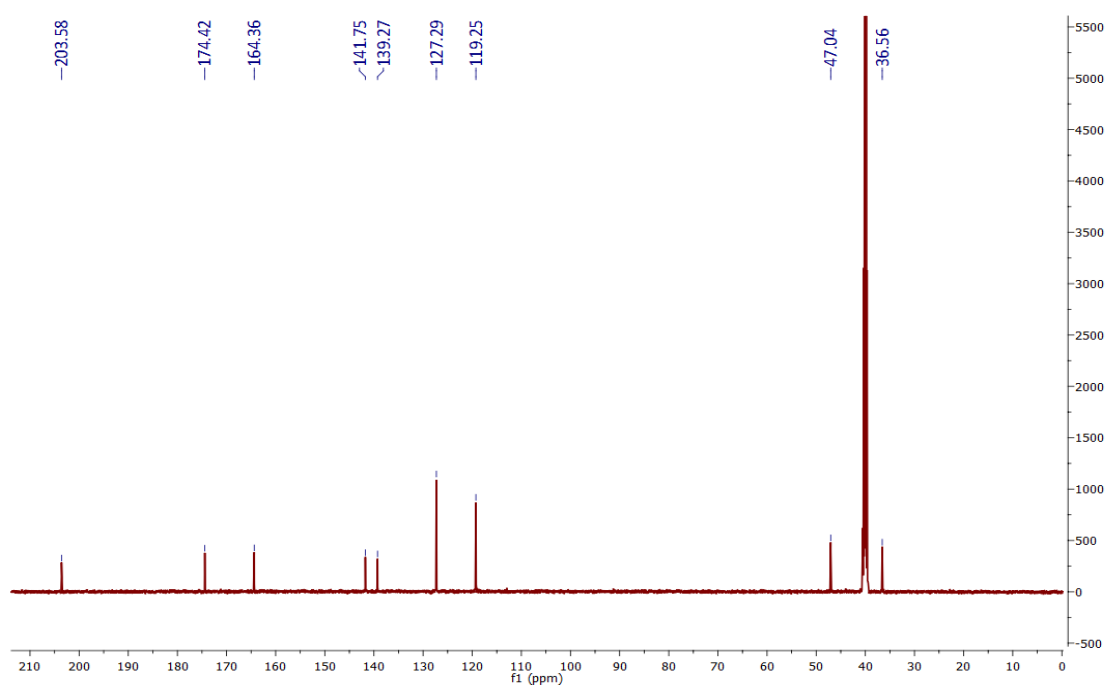

Figure S4. <sup>13</sup>C NMR of **5** in DMSO-*d*<sub>6</sub>

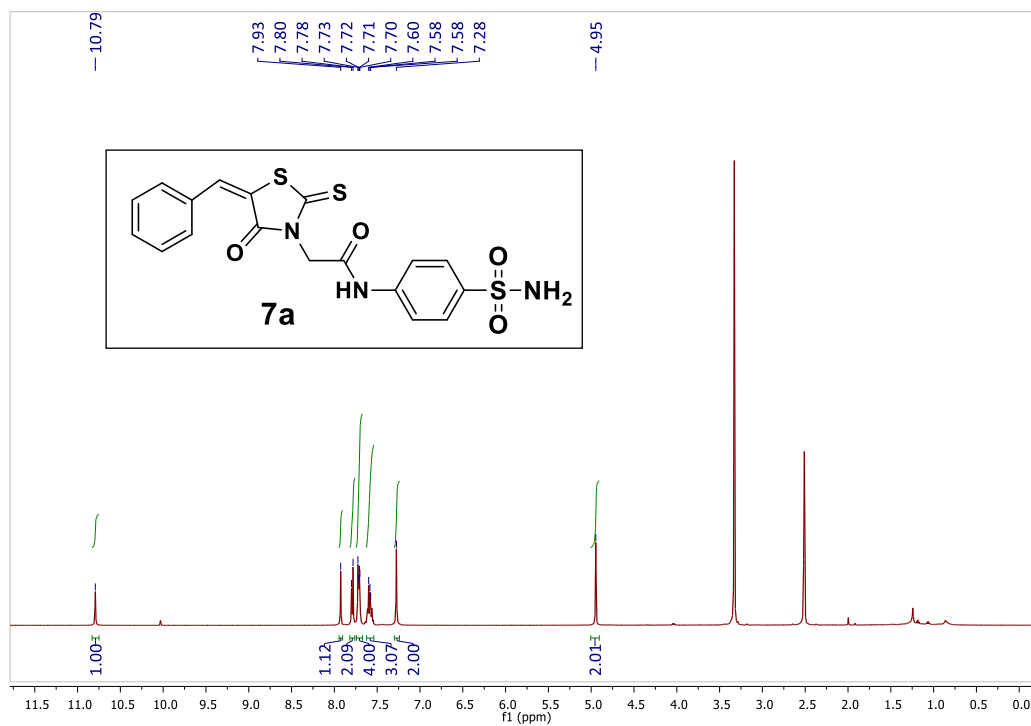

Figure S5. <sup>1</sup>H NMR of **7a** in DMSO-*d*<sub>6</sub>

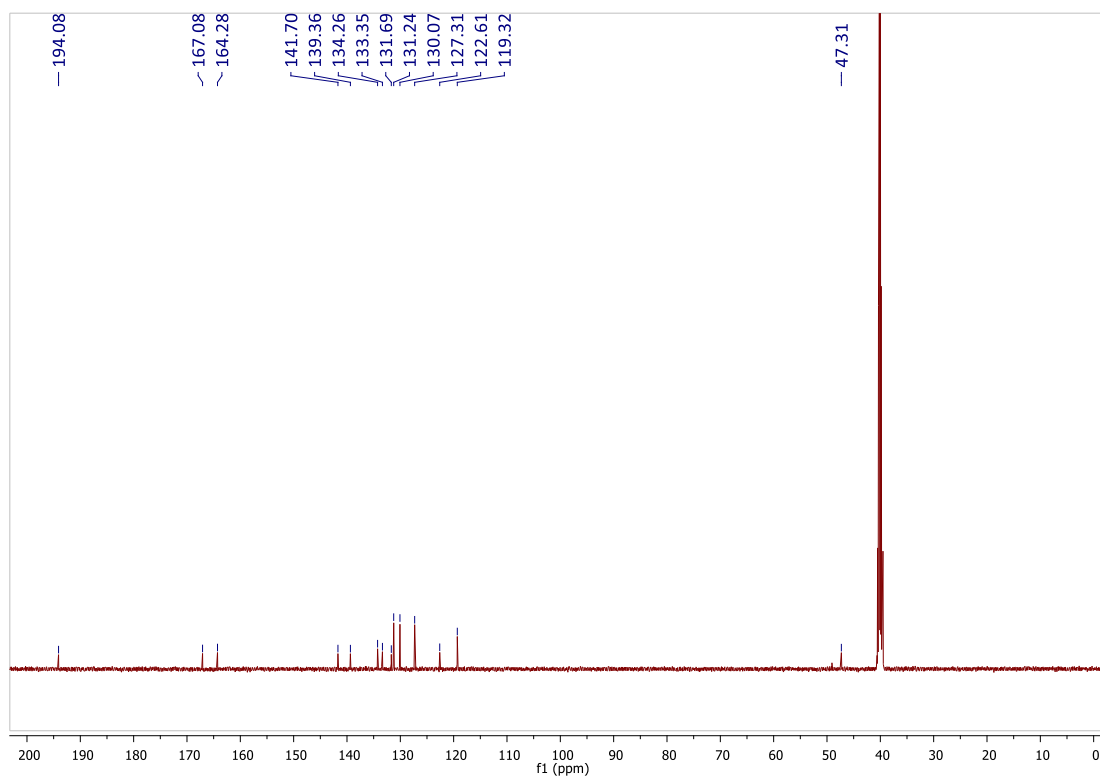

Figure S6. <sup>13</sup>C NMR of **7a** in DMSO-*d*<sub>6</sub>

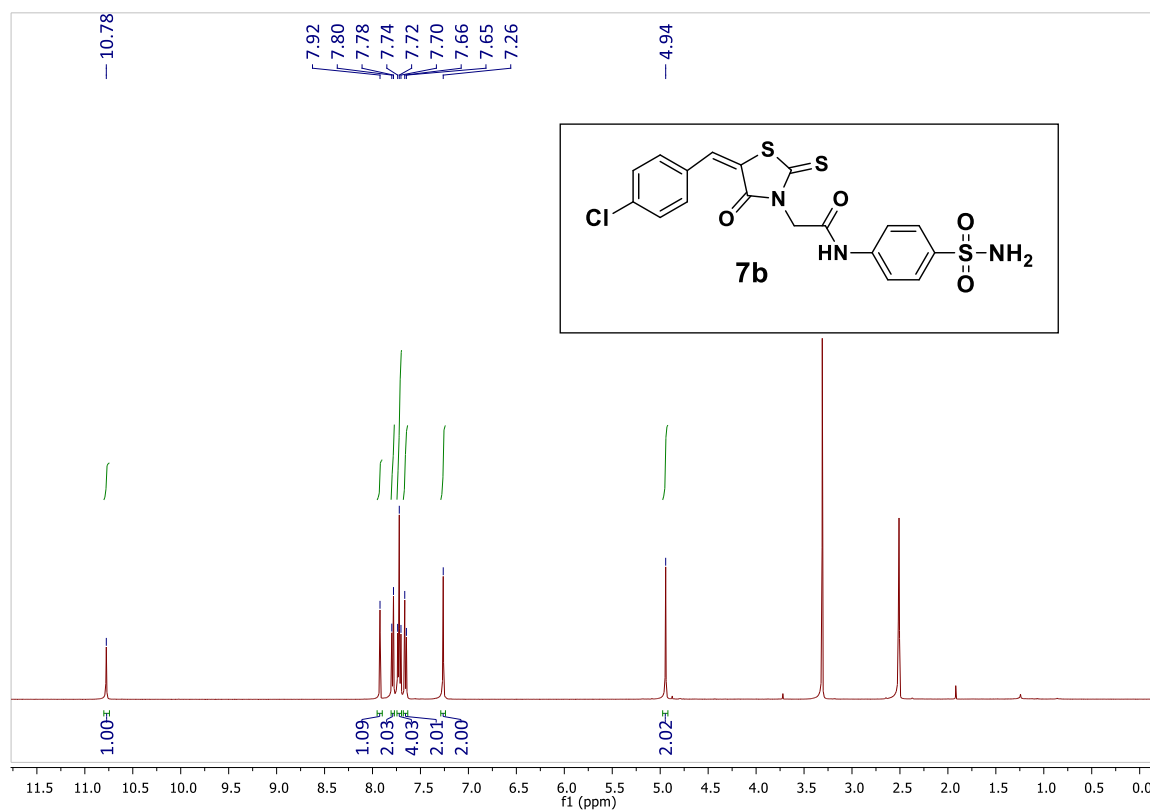

Figure S7.  $^1\text{H}$  NMR of **7b** in  $\text{DMSO-}d_6$

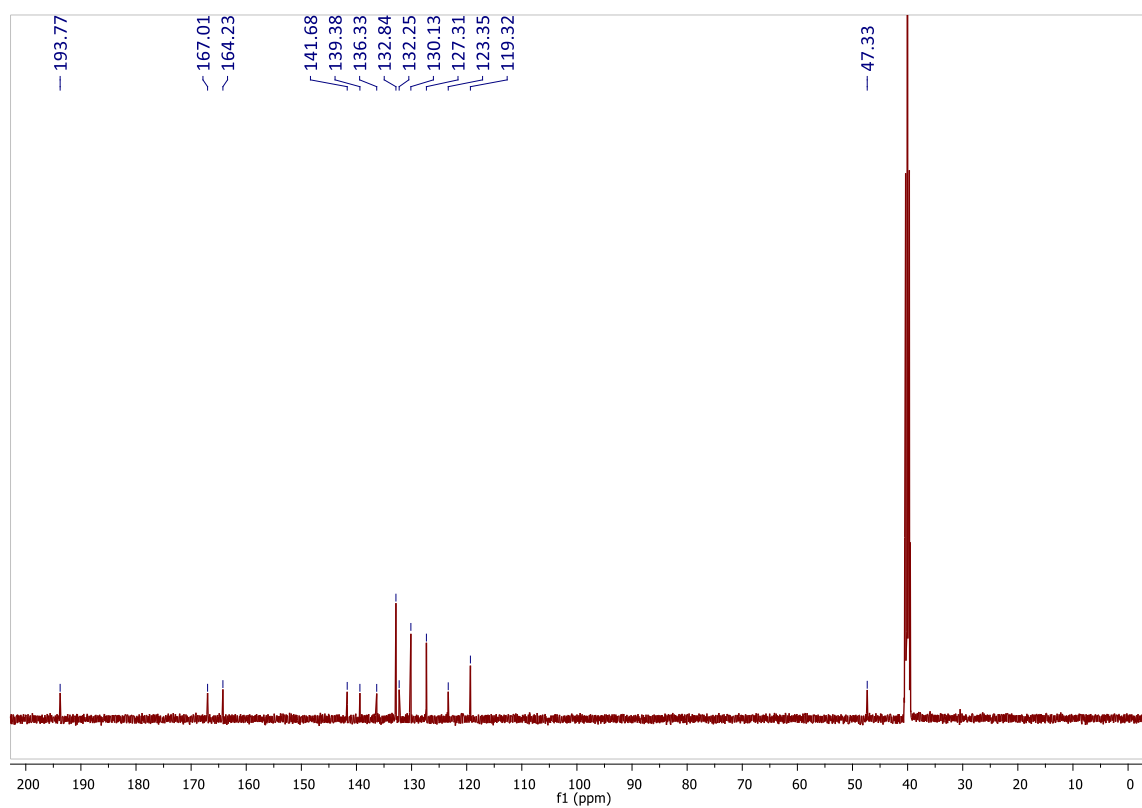

Figure S8.  $^{13}\text{C}$  NMR of **7b** in  $\text{DMSO-}d_6$

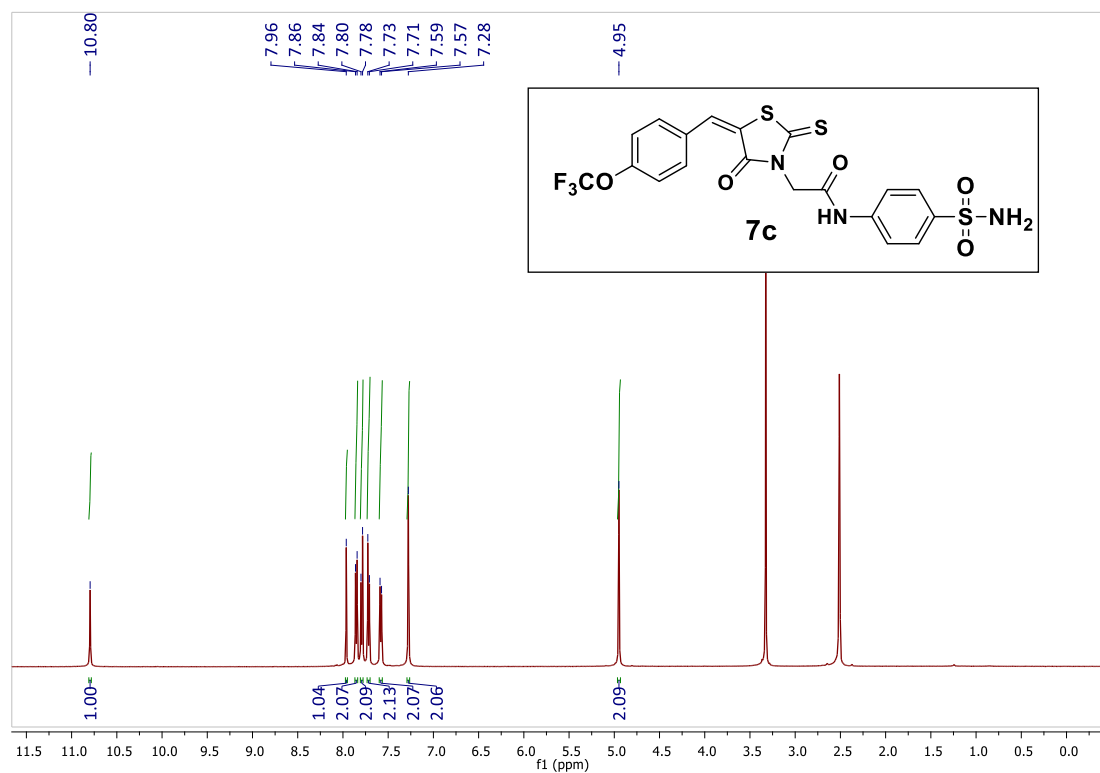

Figure S9. <sup>1</sup>H NMR of **7c** in DMSO-*d*<sub>6</sub>

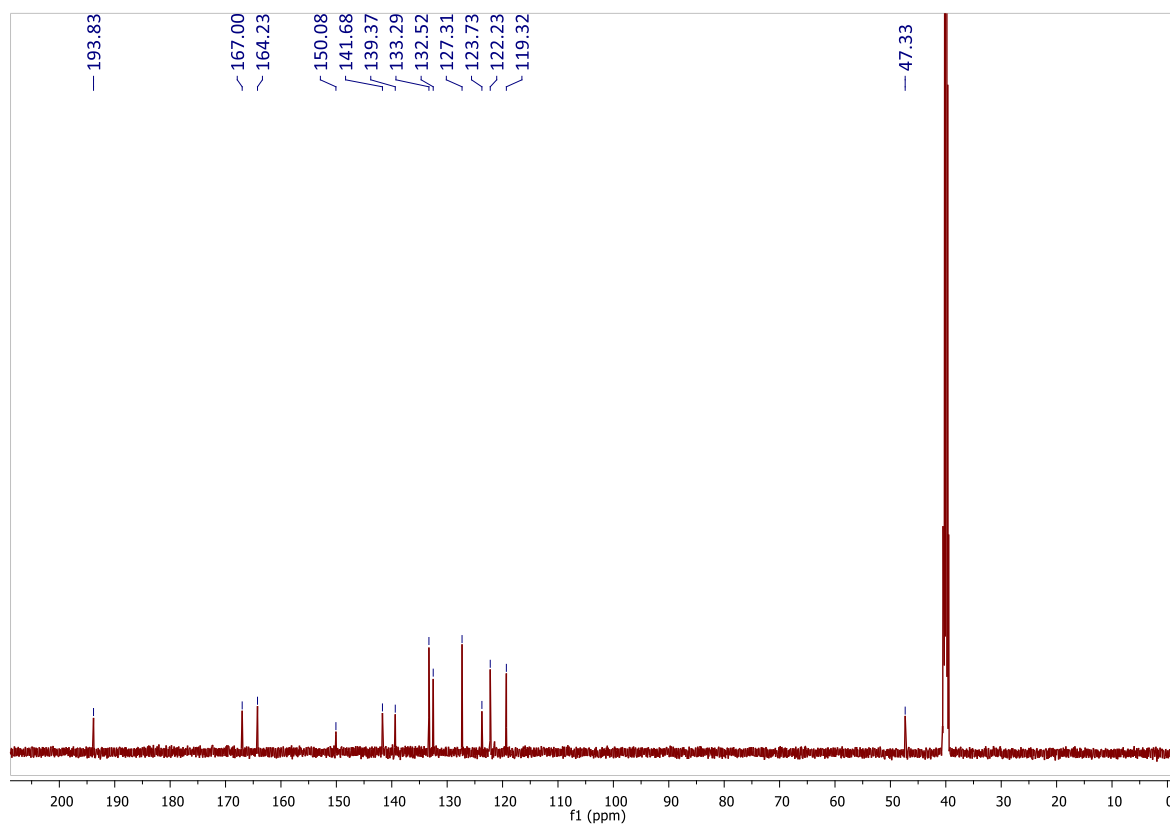

Figure S10. <sup>13</sup>C NMR of **7c** in DMSO-*d*<sub>6</sub>

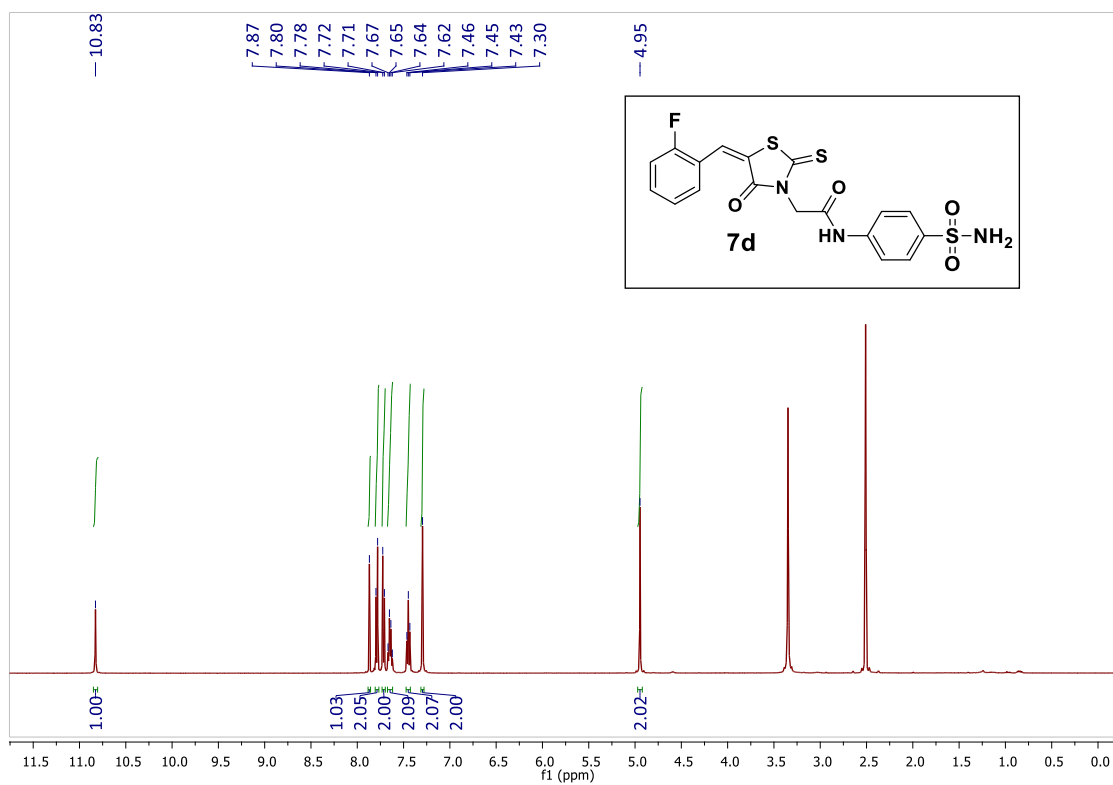

Figure S11. <sup>1</sup>H NMR of **7d** in DMSO-*d*<sub>6</sub>

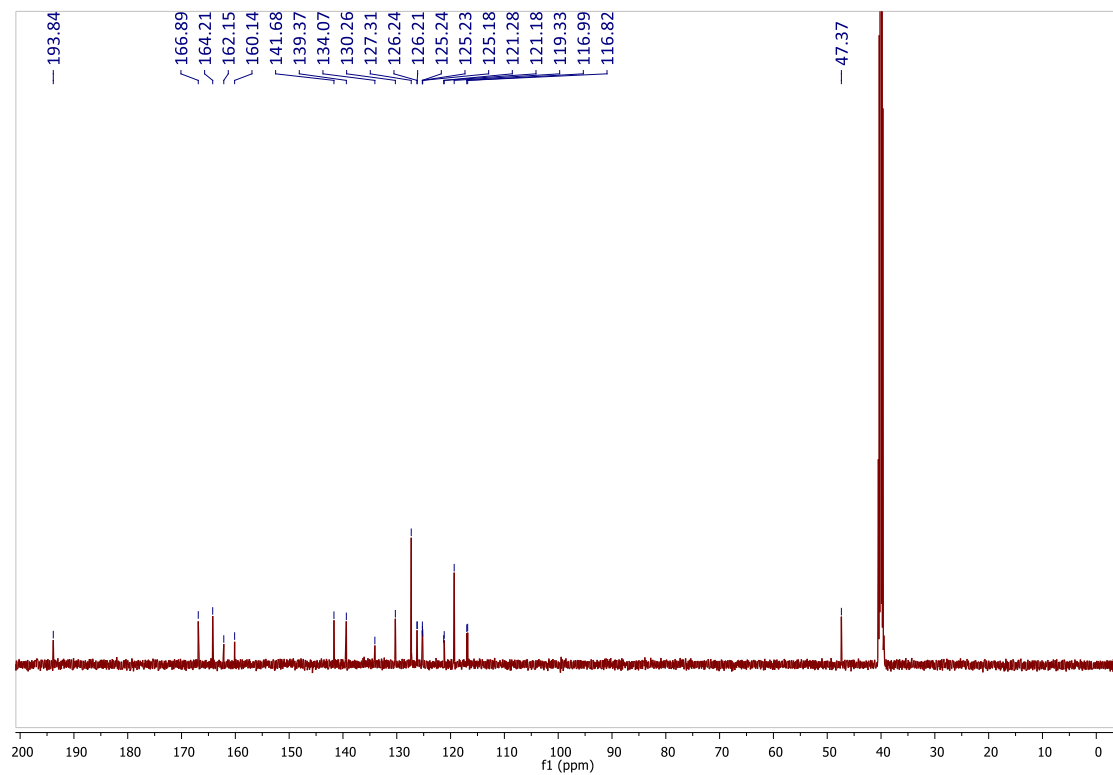

Figure S12. <sup>13</sup>C NMR of **7d** in DMSO-*d*<sub>6</sub>

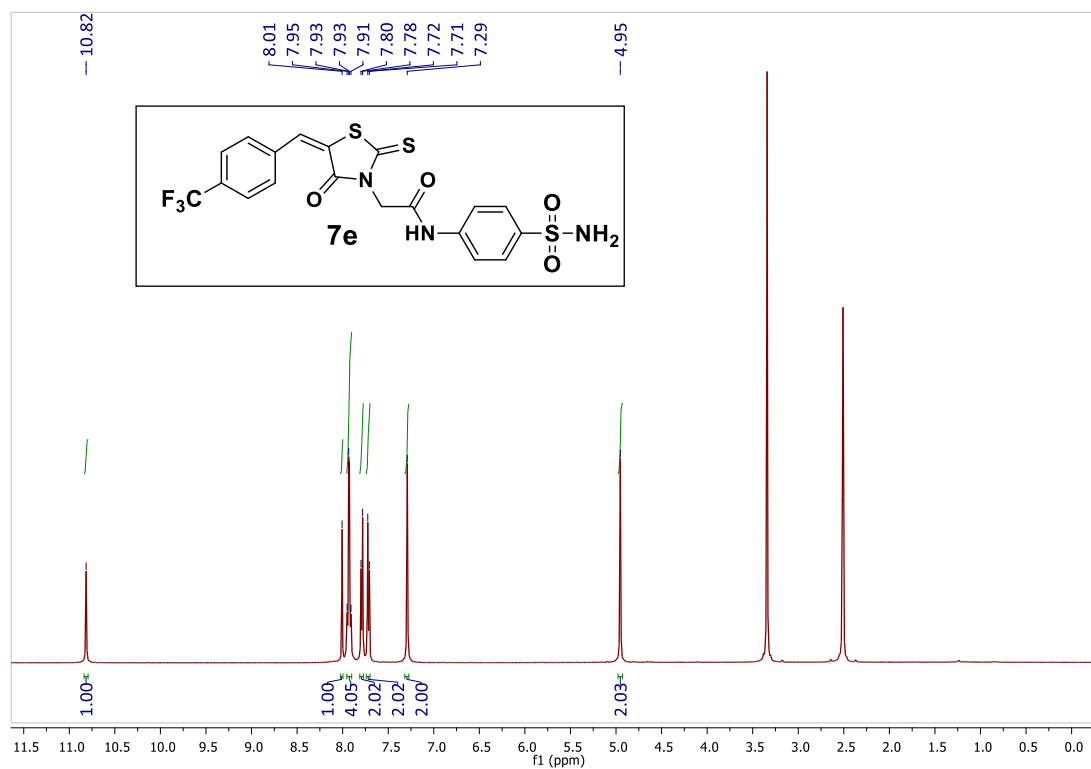

Figure S13. <sup>1</sup>H NMR of **7e** in DMSO-*d*<sub>6</sub>

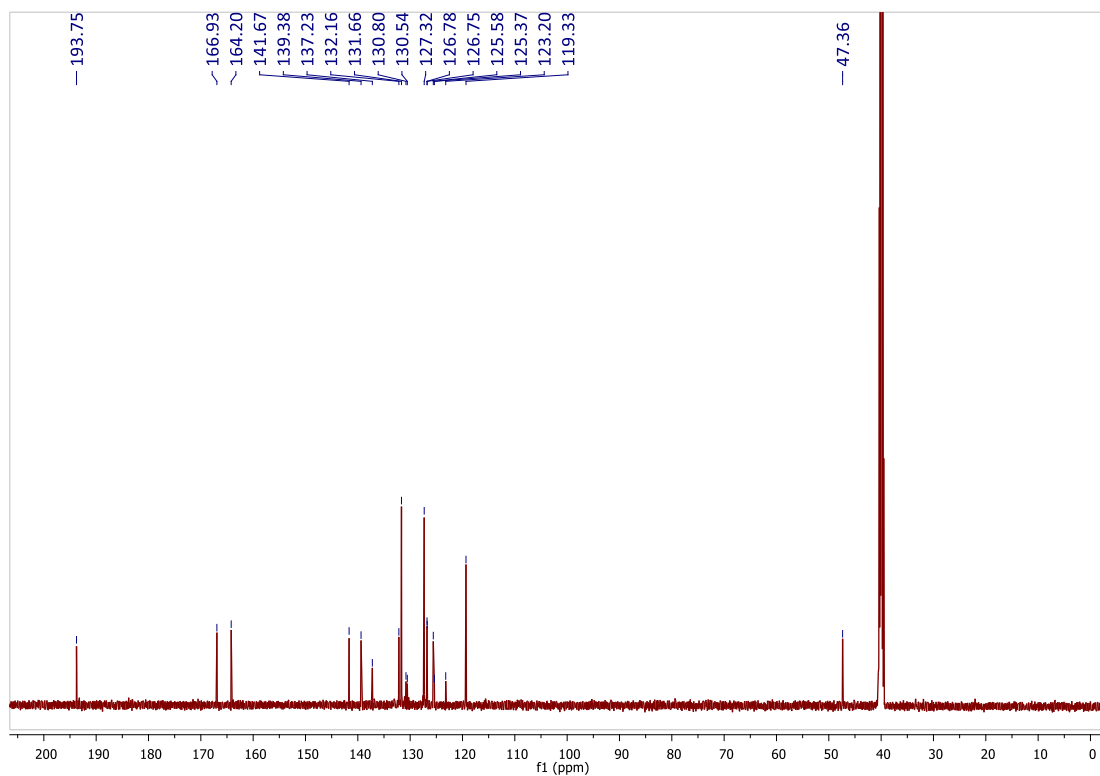

Figure S14. <sup>13</sup>C NMR of **7e** in DMSO-*d*<sub>6</sub>



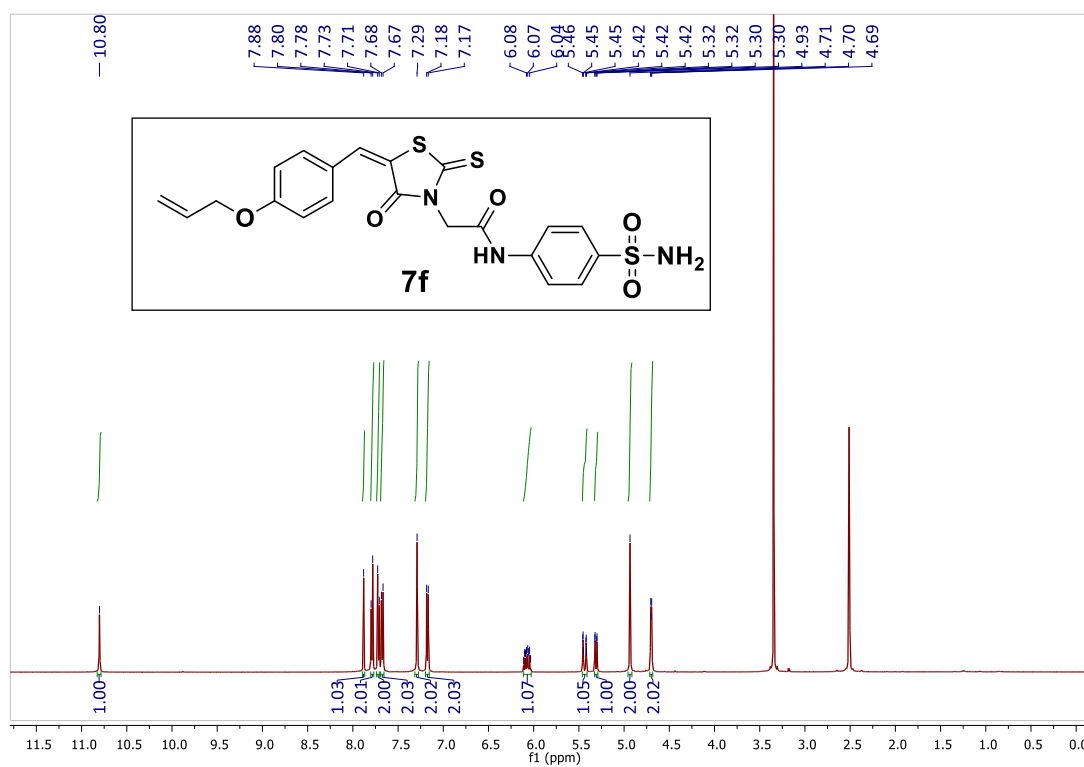

Figure S15. <sup>1</sup>H NMR of **7f** in DMSO-*d*<sub>6</sub>

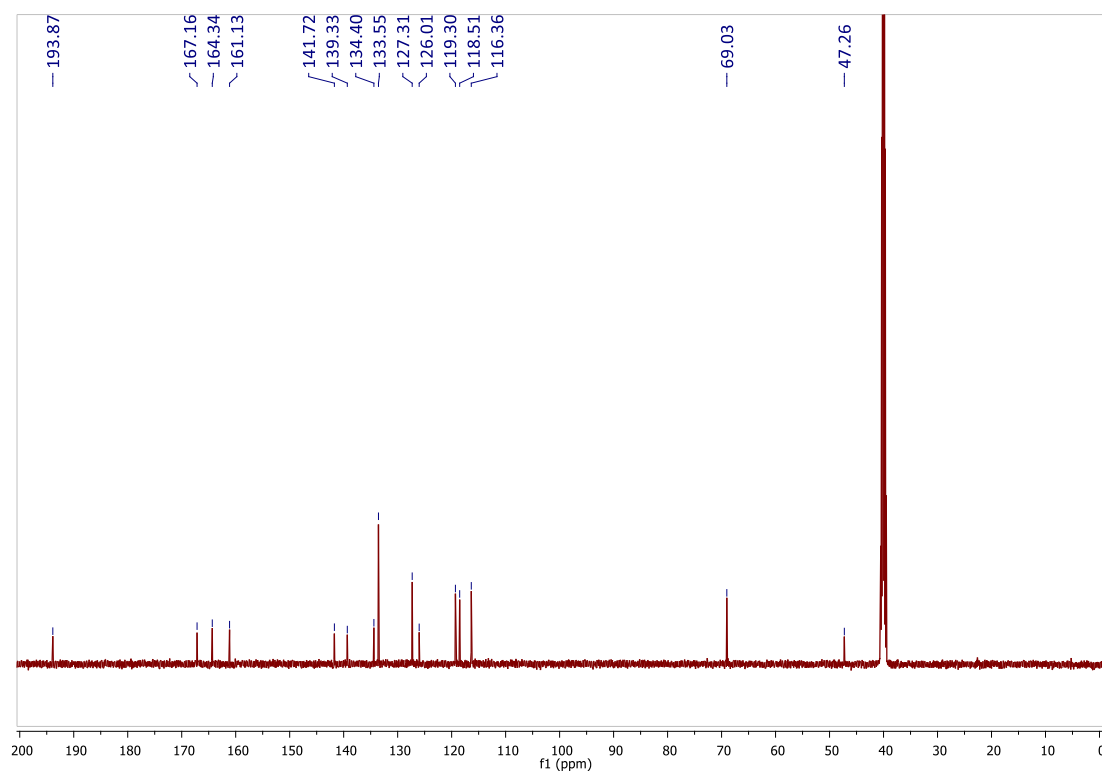

Figure S16. <sup>13</sup>C NMR of **7f** in DMSO-*d*<sub>6</sub>

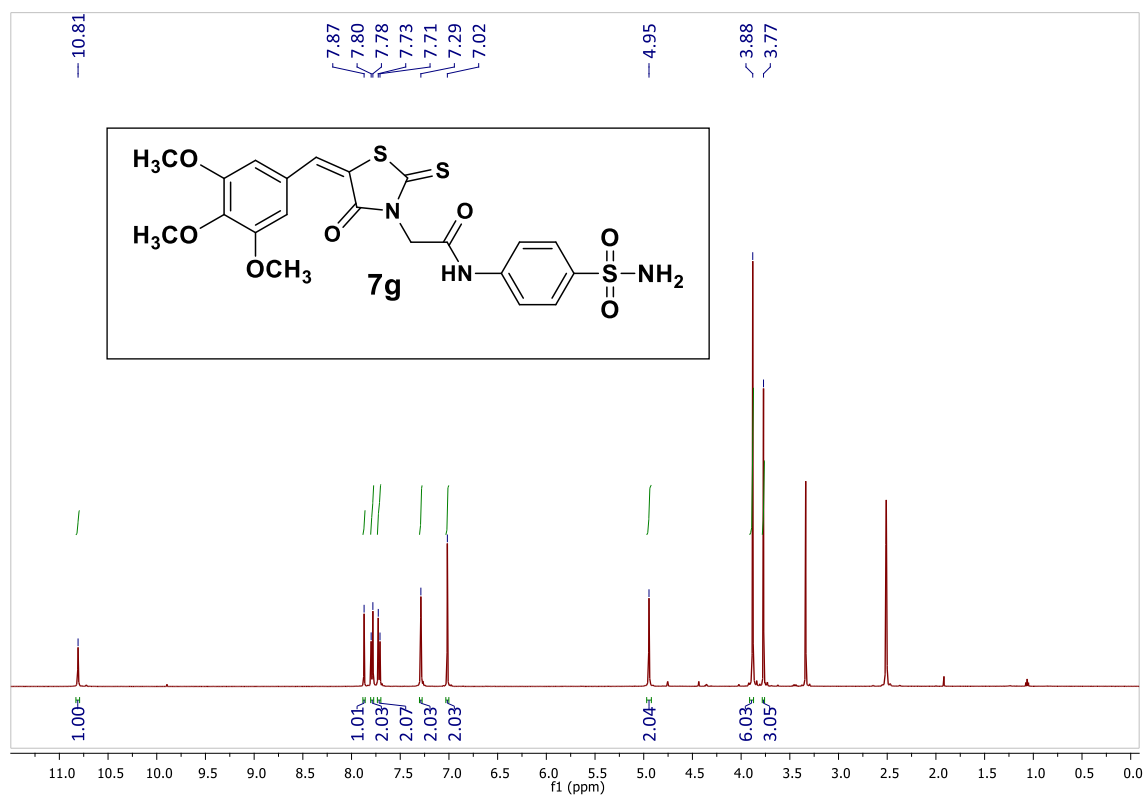

Figure S17. <sup>1</sup>H NMR of **7g** in DMSO-*d*<sub>6</sub>

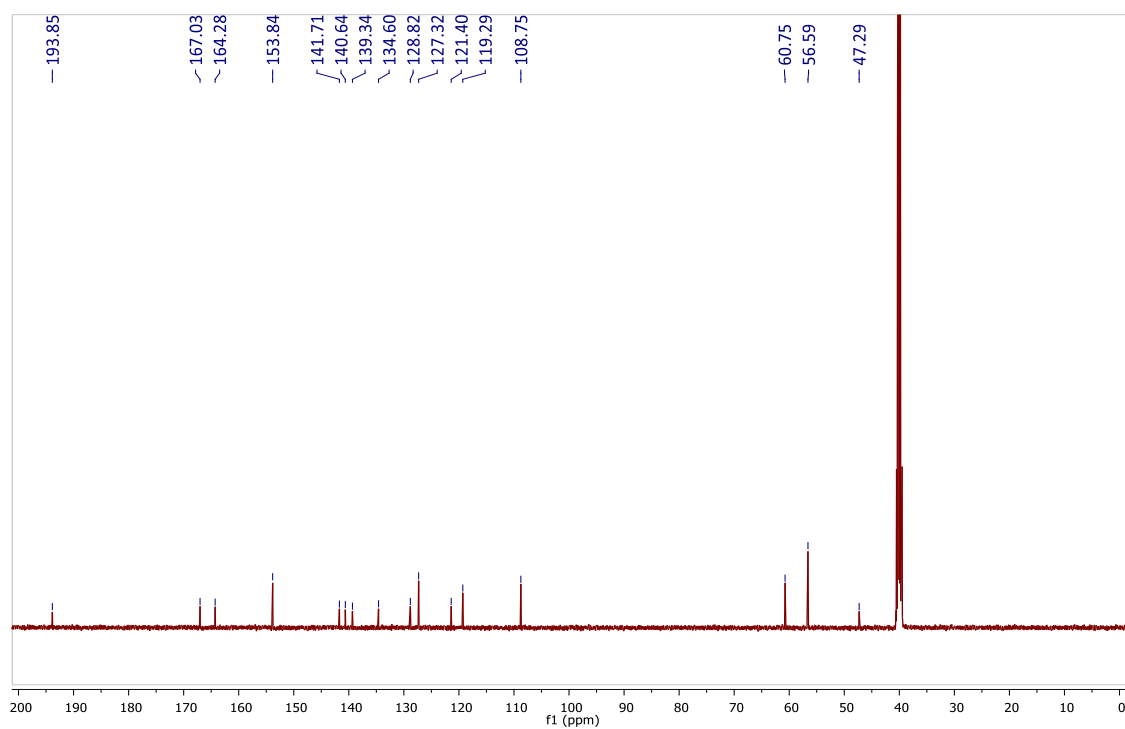

Figure S18. <sup>13</sup>C NMR of **7g** in DMSO-*d*<sub>6</sub>

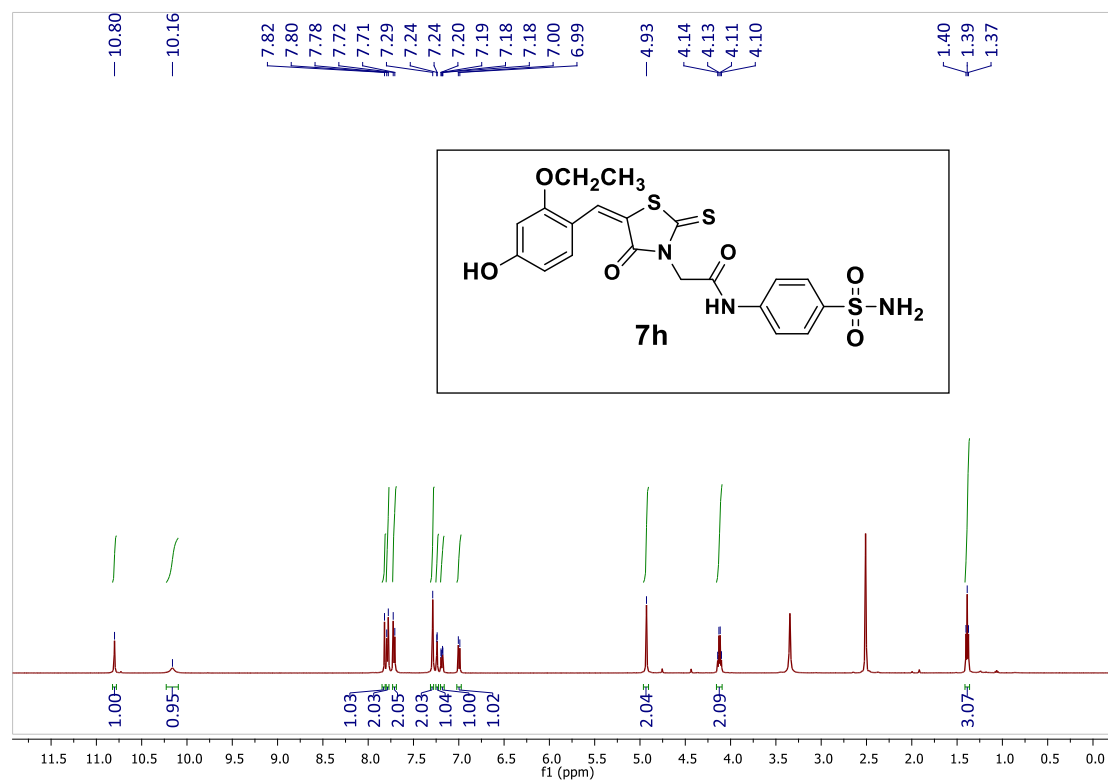

Figure S19. <sup>1</sup>H NMR of **7h** in DMSO-*d*<sub>6</sub>

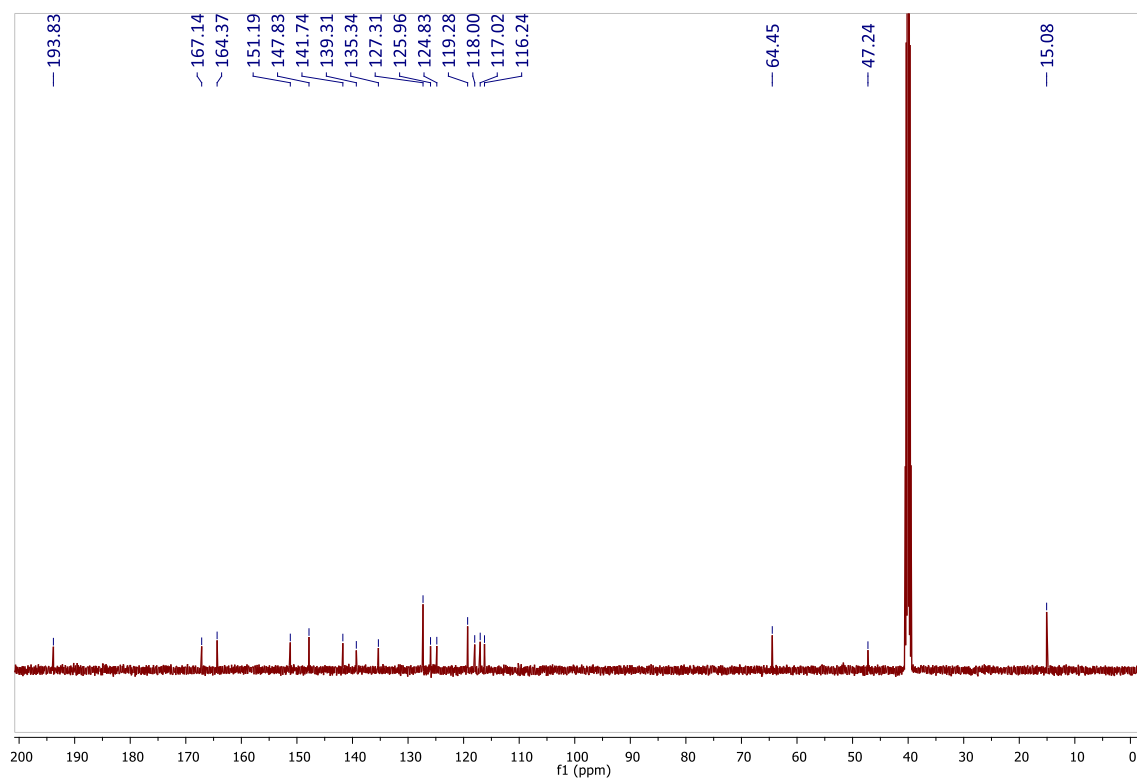

Figure S20. <sup>13</sup>C NMR of **7h** in DMSO-*d*<sub>6</sub>

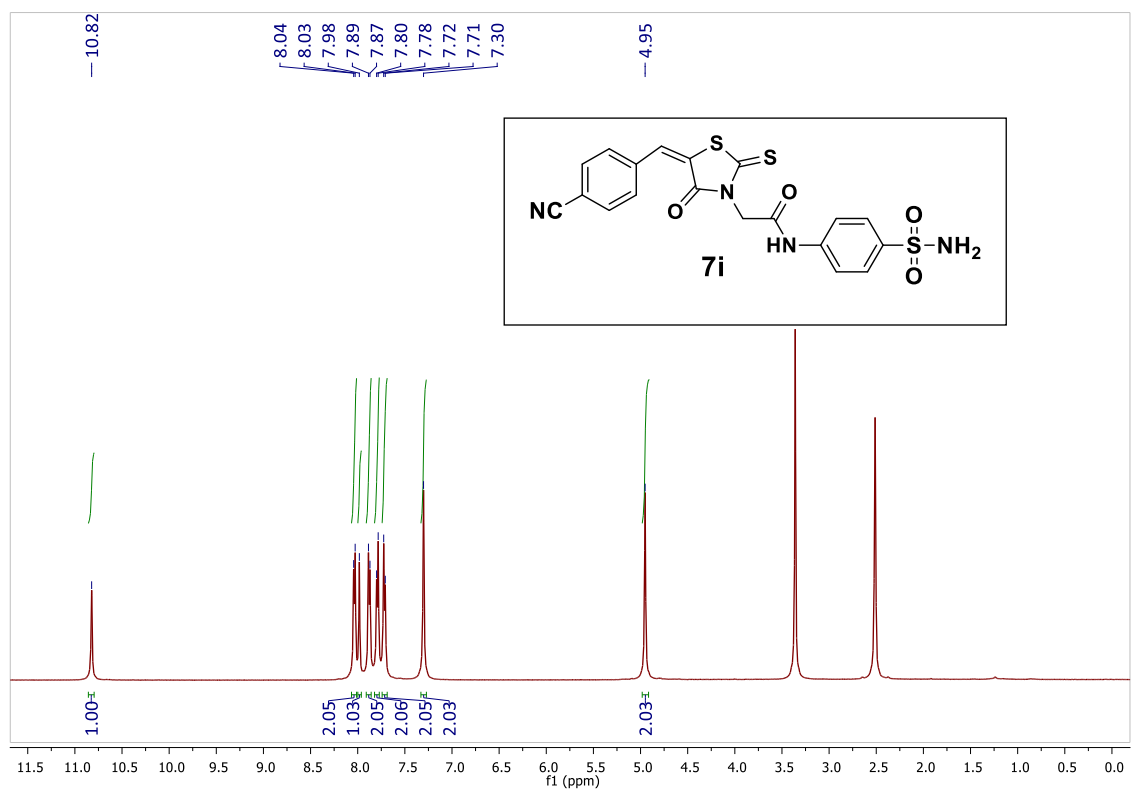

Figure S21. <sup>1</sup>H NMR of **7i** in DMSO-*d*<sub>6</sub>

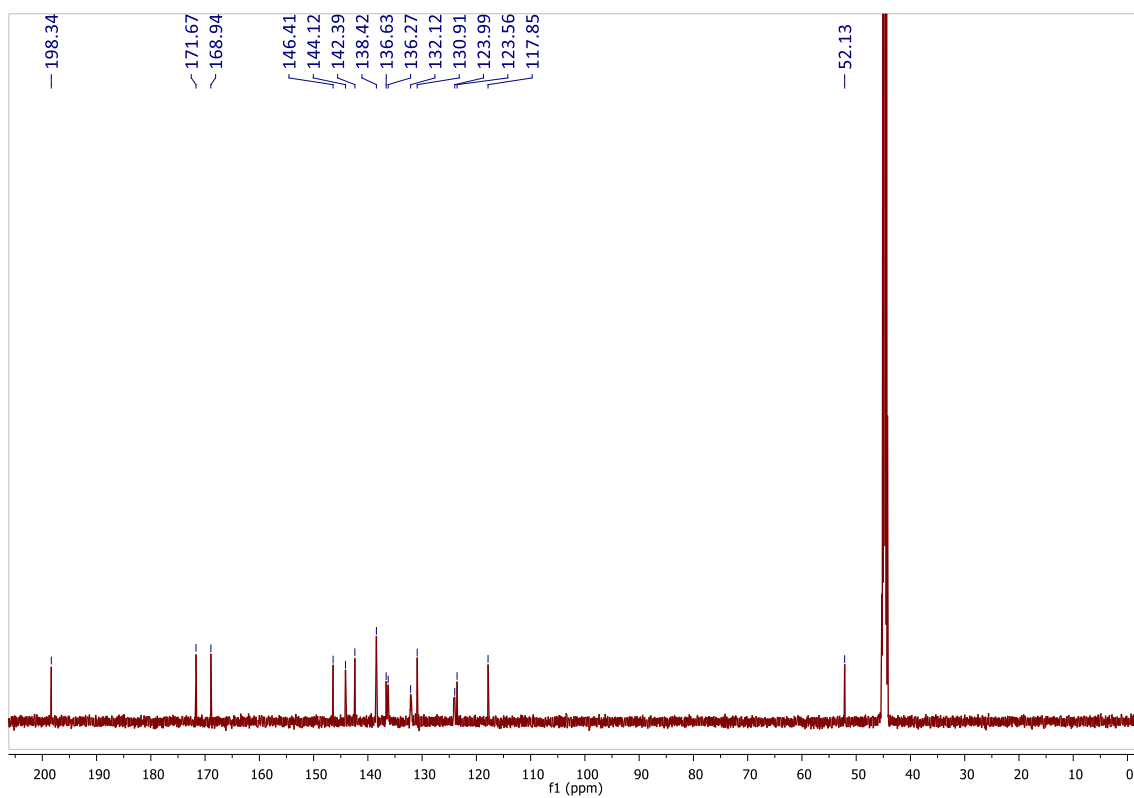

Figure S22. <sup>13</sup>C NMR of **7i** in DMSO-*d*<sub>6</sub>

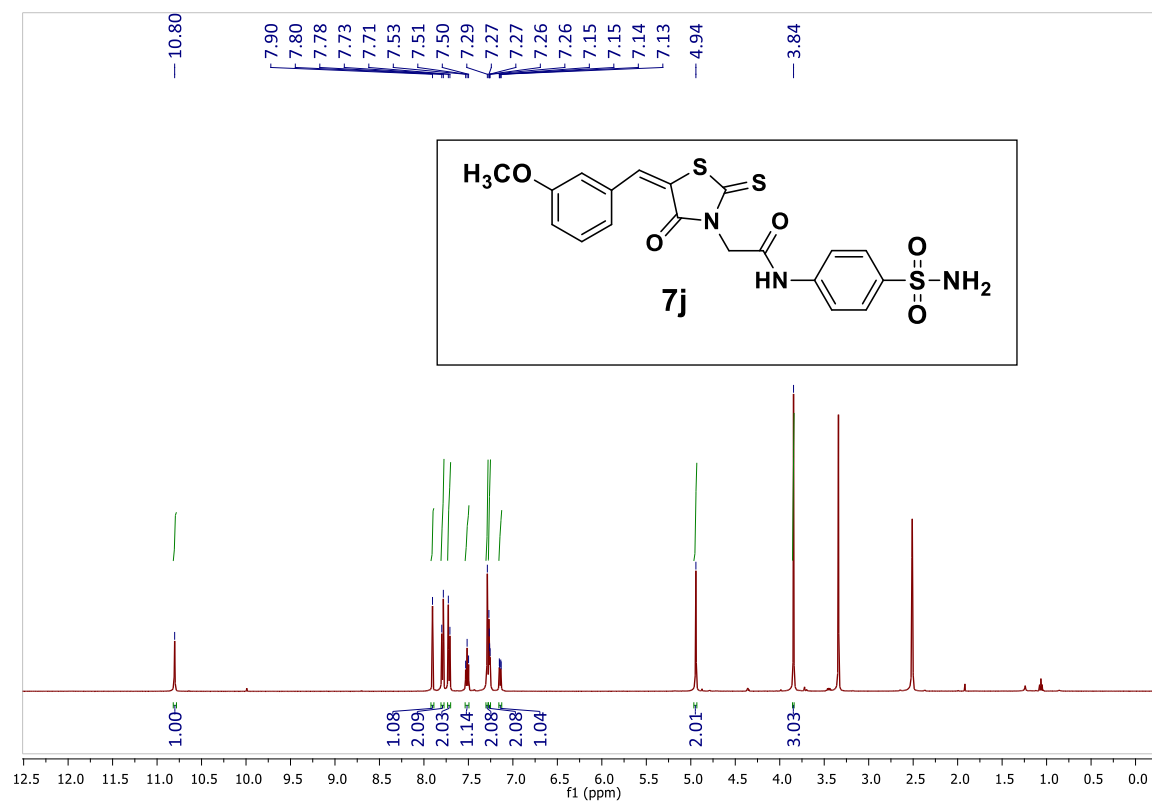

Figure S23. <sup>1</sup>H NMR of **7j** in DMSO-*d*<sub>6</sub>

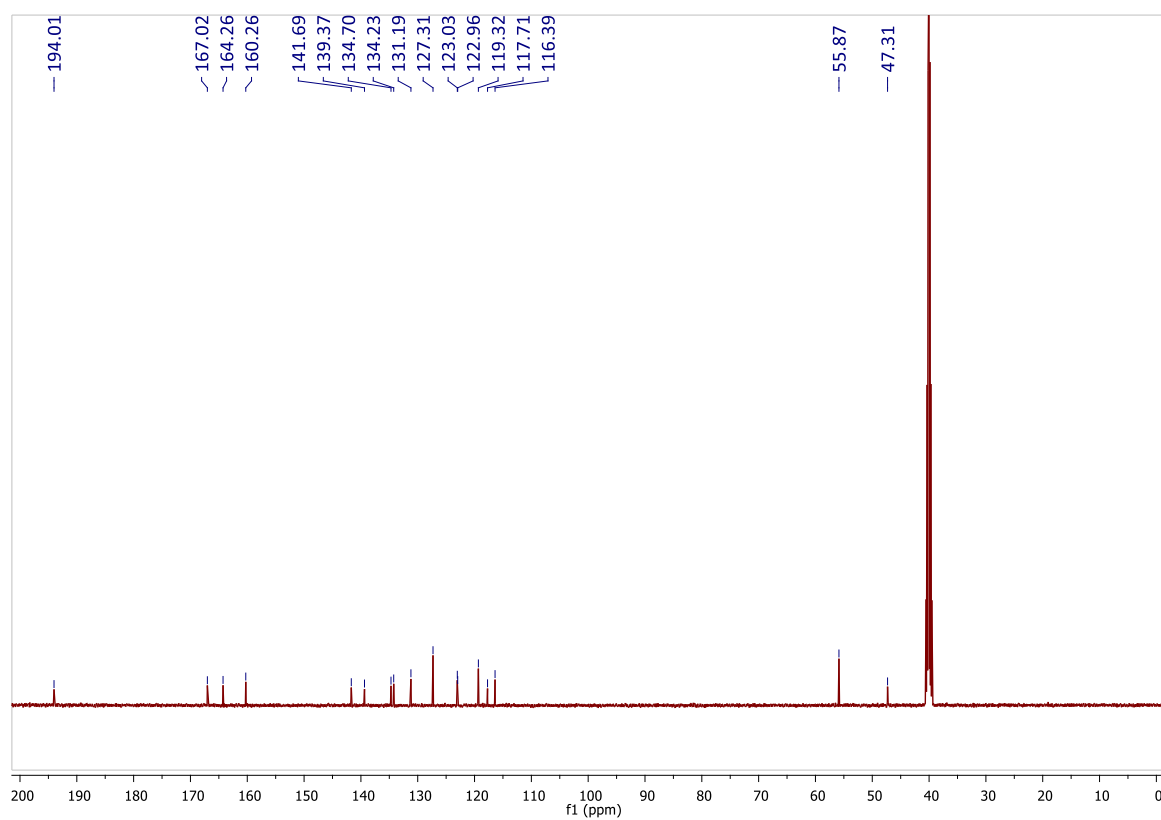

Figure S24. <sup>13</sup>C NMR of **7j** in DMSO-*d*<sub>6</sub>

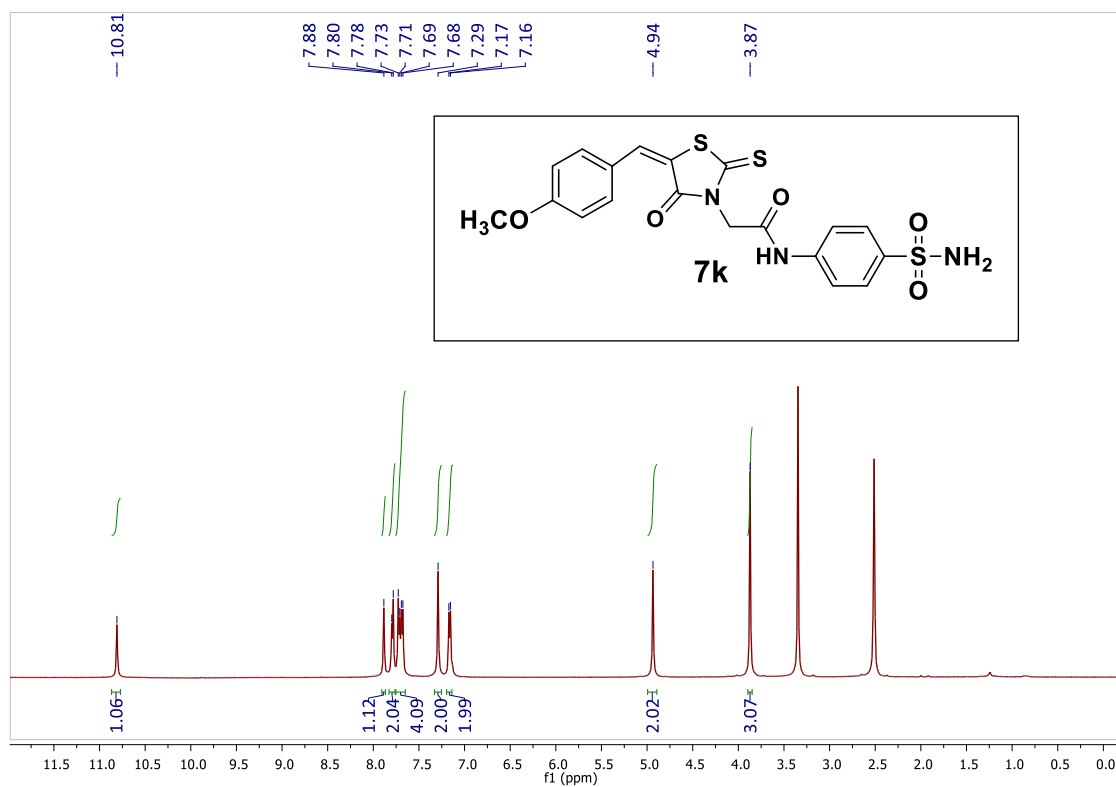

Figure S25. <sup>1</sup>H NMR of **7k** in DMSO-*d*<sub>6</sub>

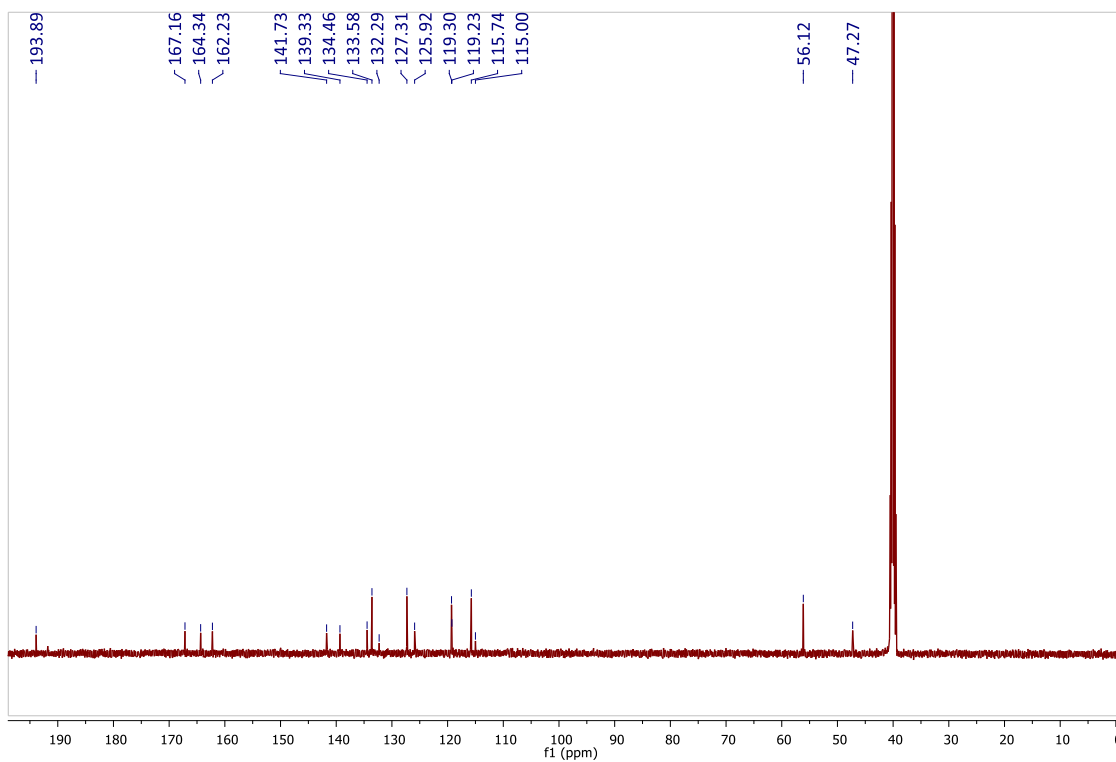

Figure S26. <sup>13</sup>C NMR of **7k** in DMSO-*d*<sub>6</sub>

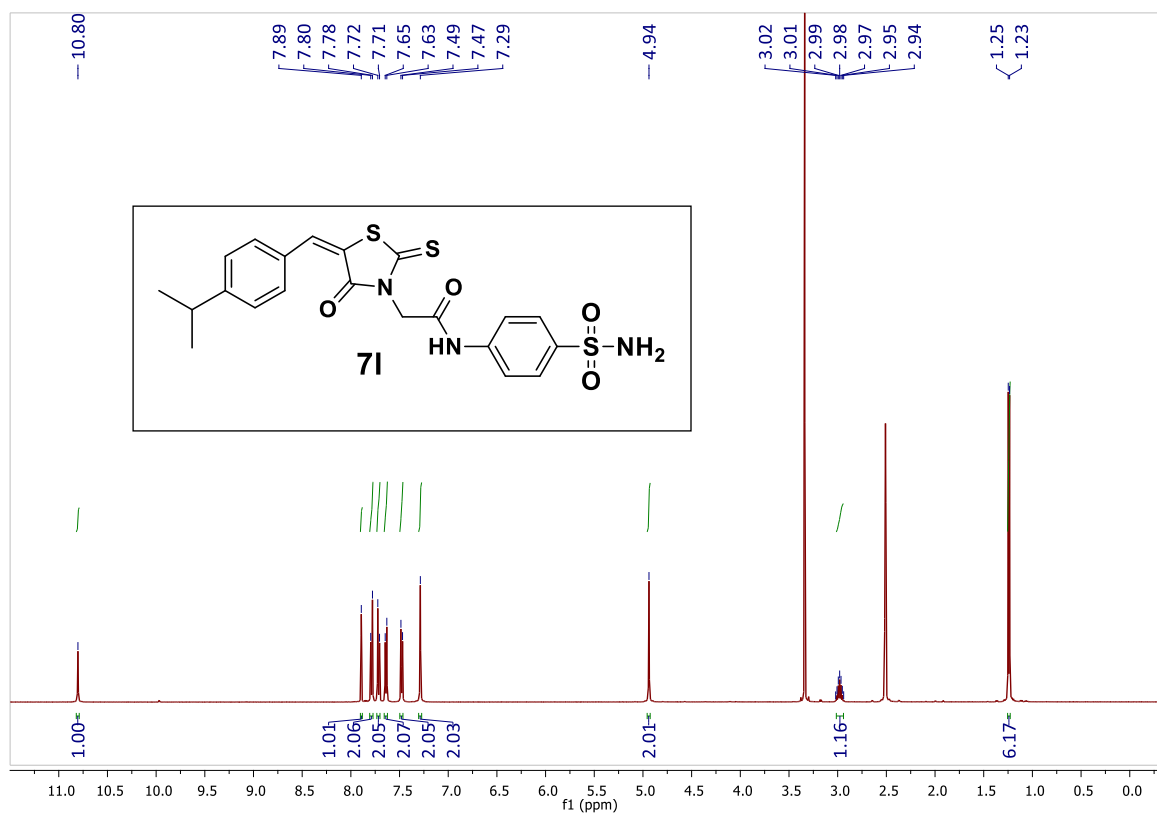

Figure S27. <sup>1</sup>H NMR of **7I** in DMSO-*d*<sub>6</sub>

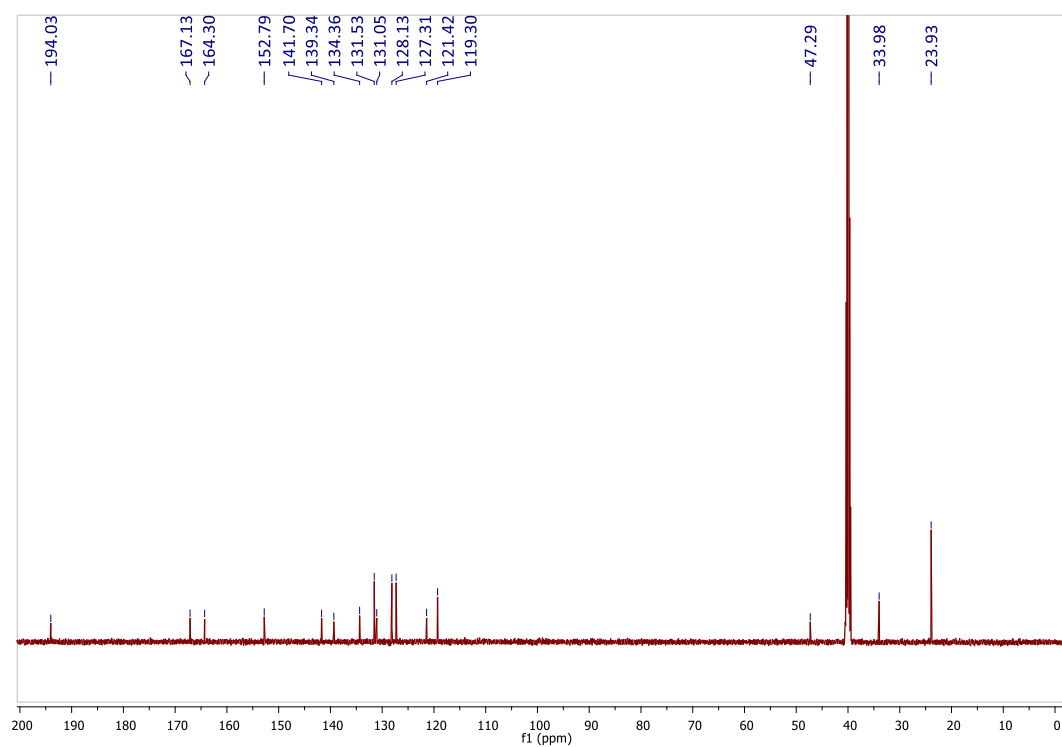

Figure S28. <sup>13</sup>C NMR of **7I** in DMSO-*d*<sub>6</sub>

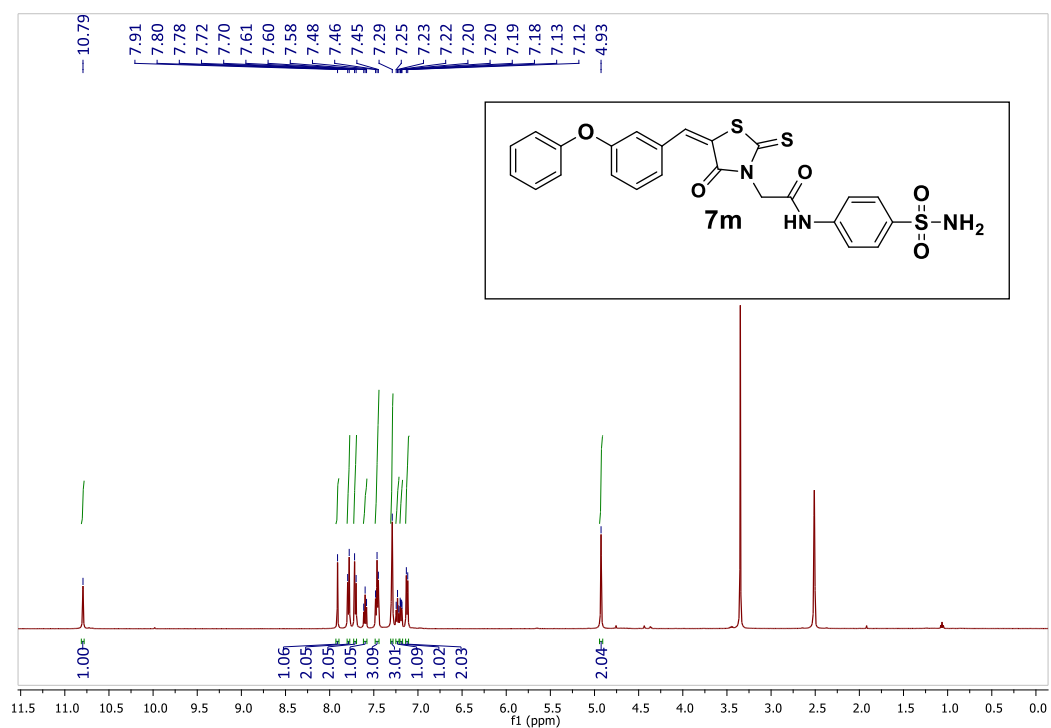

Figure S29. <sup>1</sup>H NMR of **7m** in DMSO-*d*<sub>6</sub>

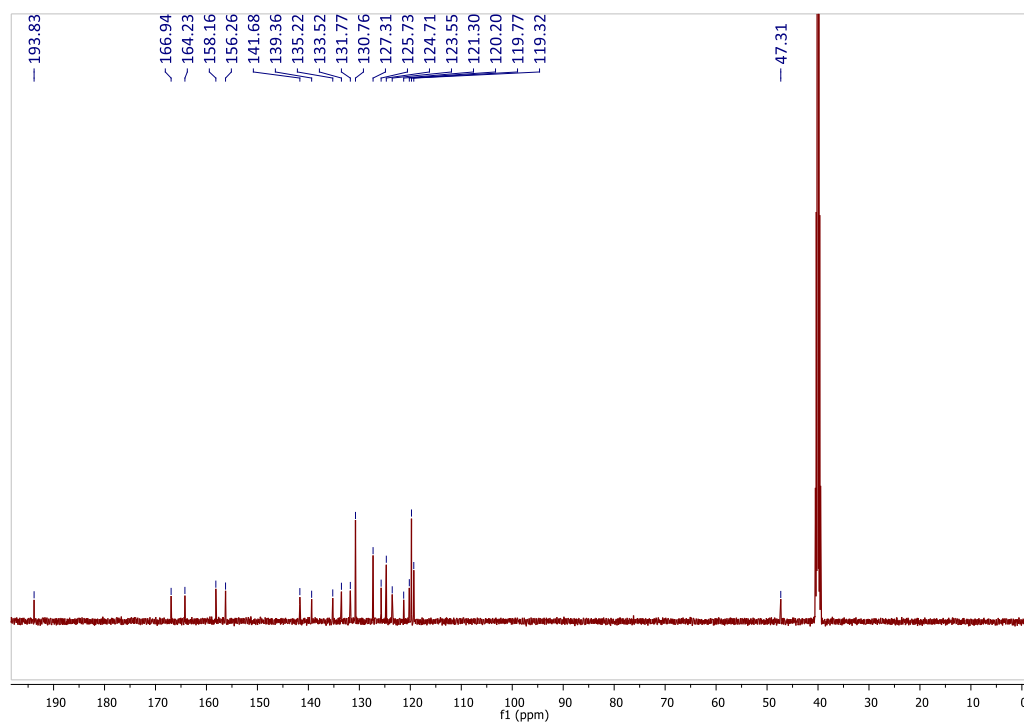

Figure S30. <sup>13</sup>C NMR of **7m** in DMSO-*d*<sub>6</sub>



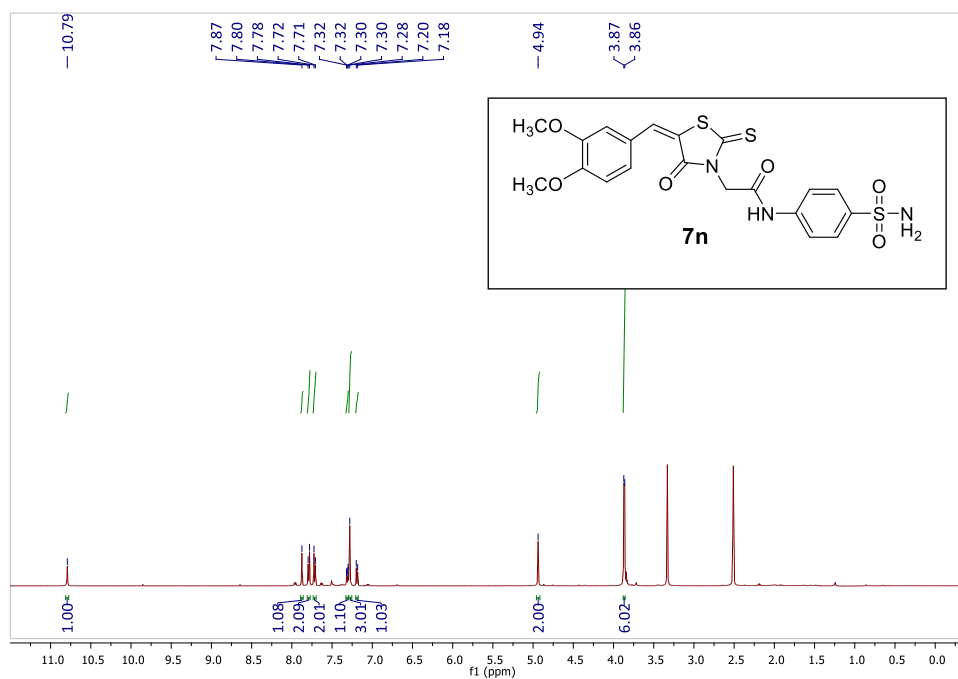

Figure S31. <sup>1</sup>H NMR of **7n** in DMSO-*d*<sub>6</sub>

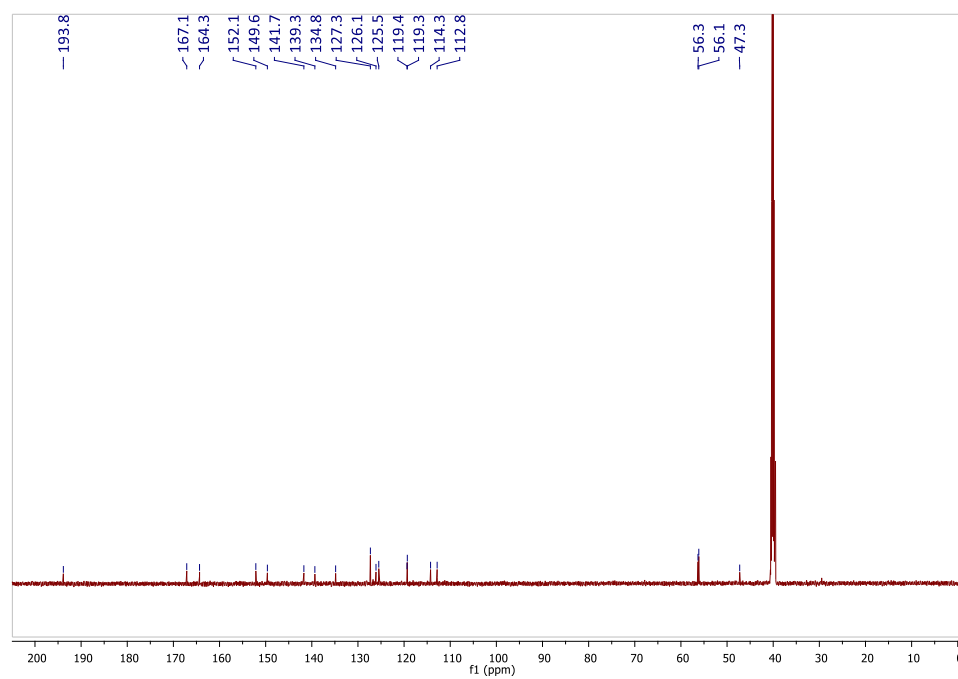

Figure S32. <sup>13</sup>C NMR of **7n** in DMSO-*d*<sub>6</sub>

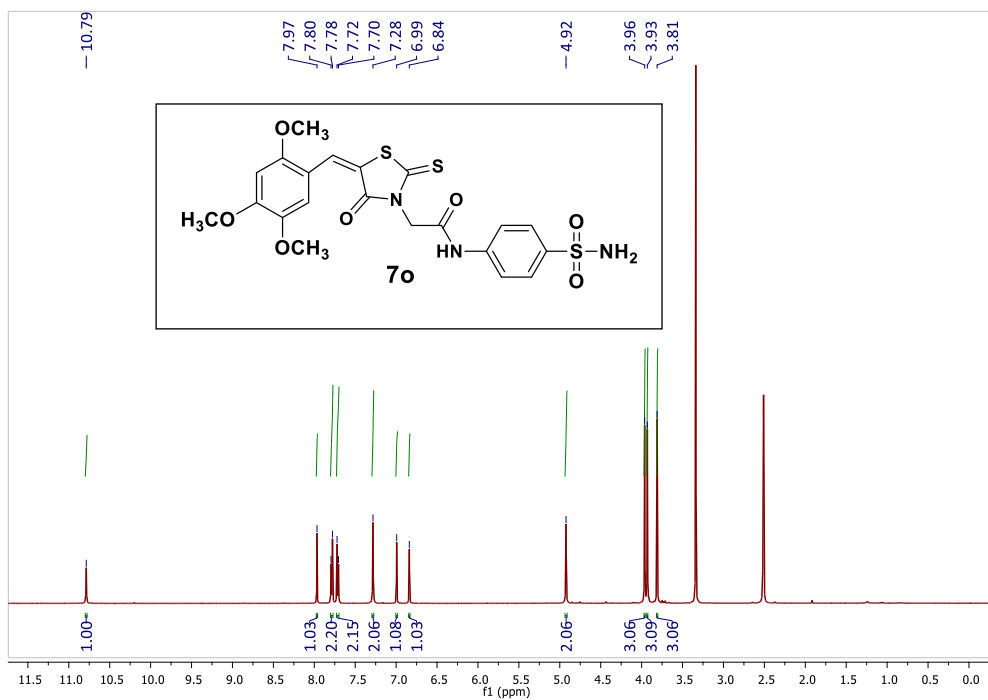

Figure S33. <sup>1</sup>H NMR of **7o** in DMSO-*d*<sub>6</sub>

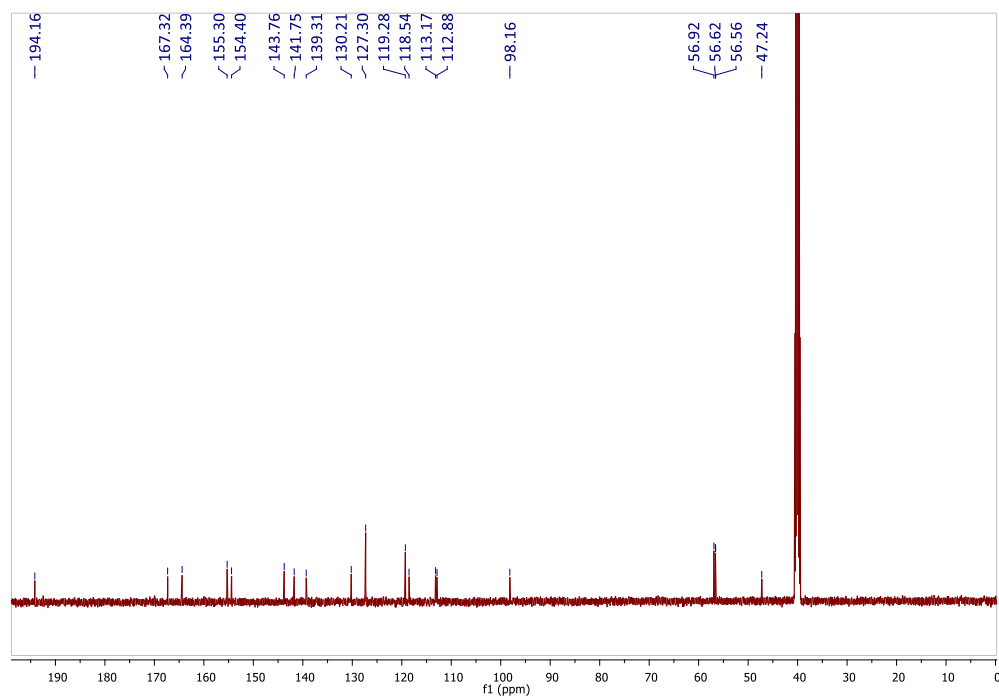

Figure S34. <sup>13</sup>C NMR of **7o** in DMSO-*d*<sub>6</sub>

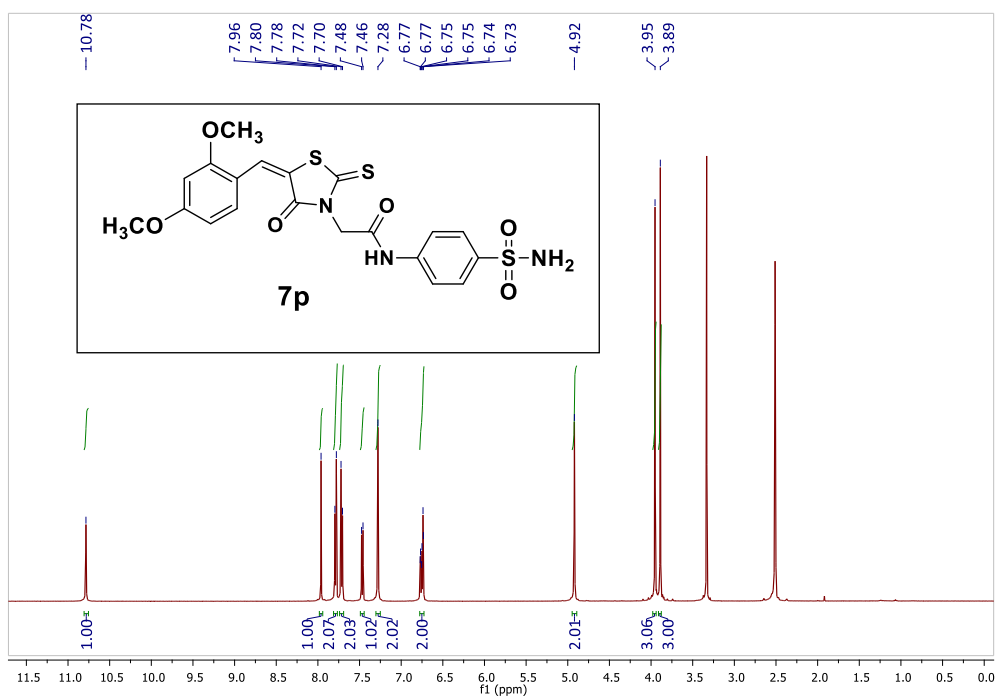

Figure S35. <sup>1</sup>H NMR of **7p** in DMSO-*d*<sub>6</sub>

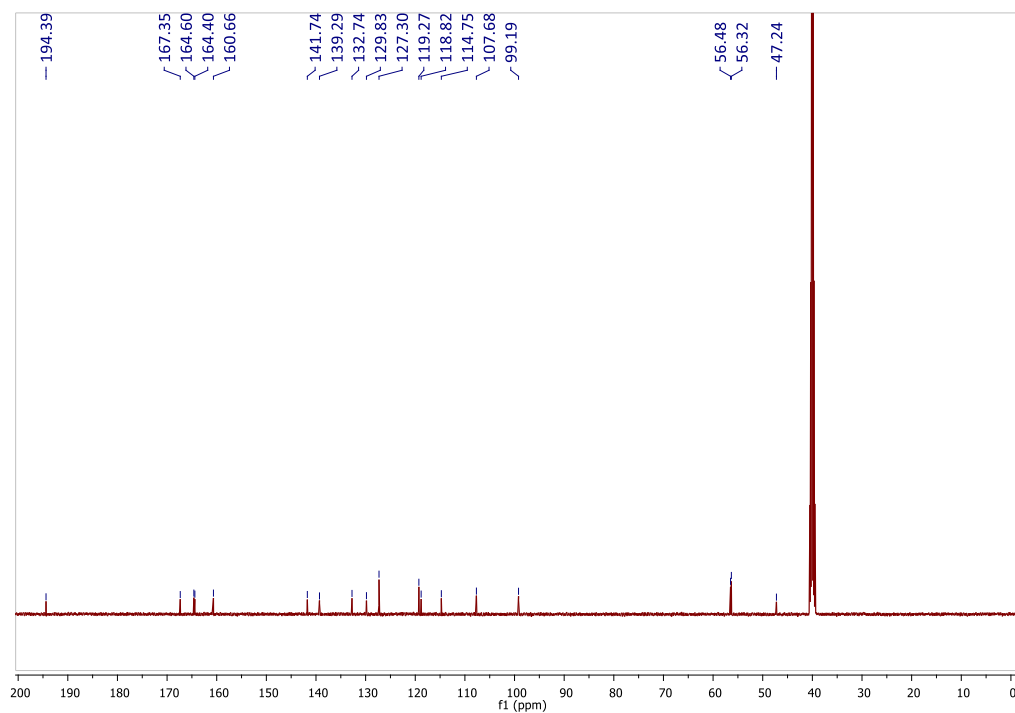

Figure S36. <sup>13</sup>C NMR of **7p** in DMSO-*d*<sub>6</sub>

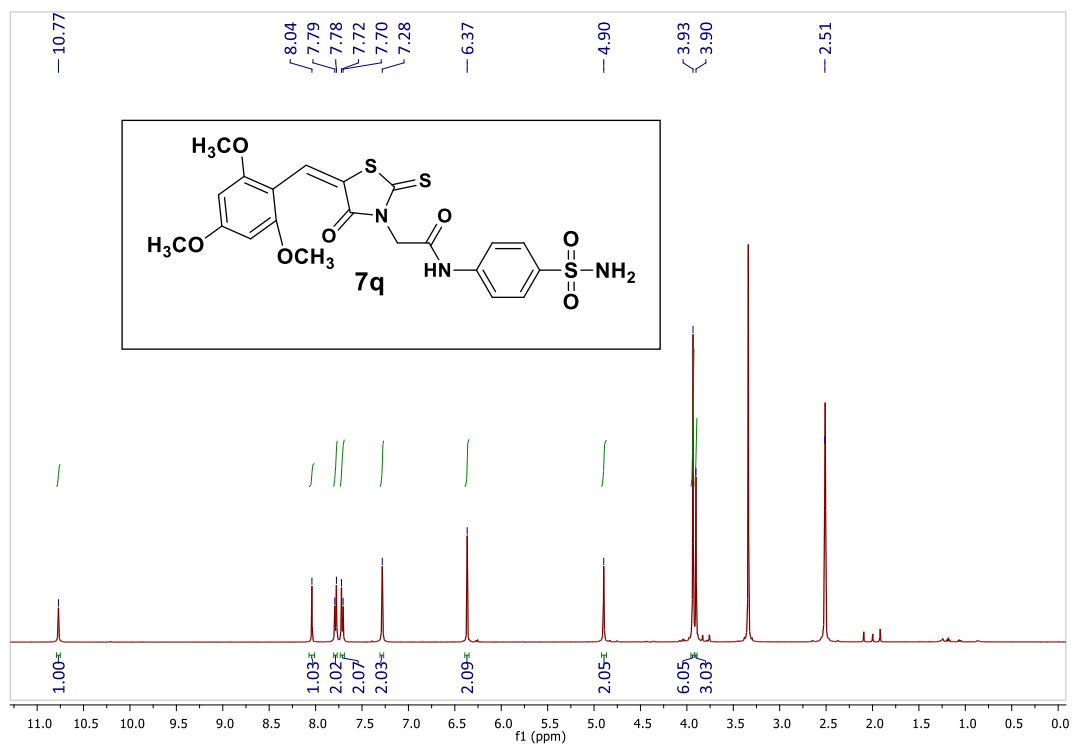

Figure S37. <sup>1</sup>H NMR of **7q** in DMSO-*d*<sub>6</sub>

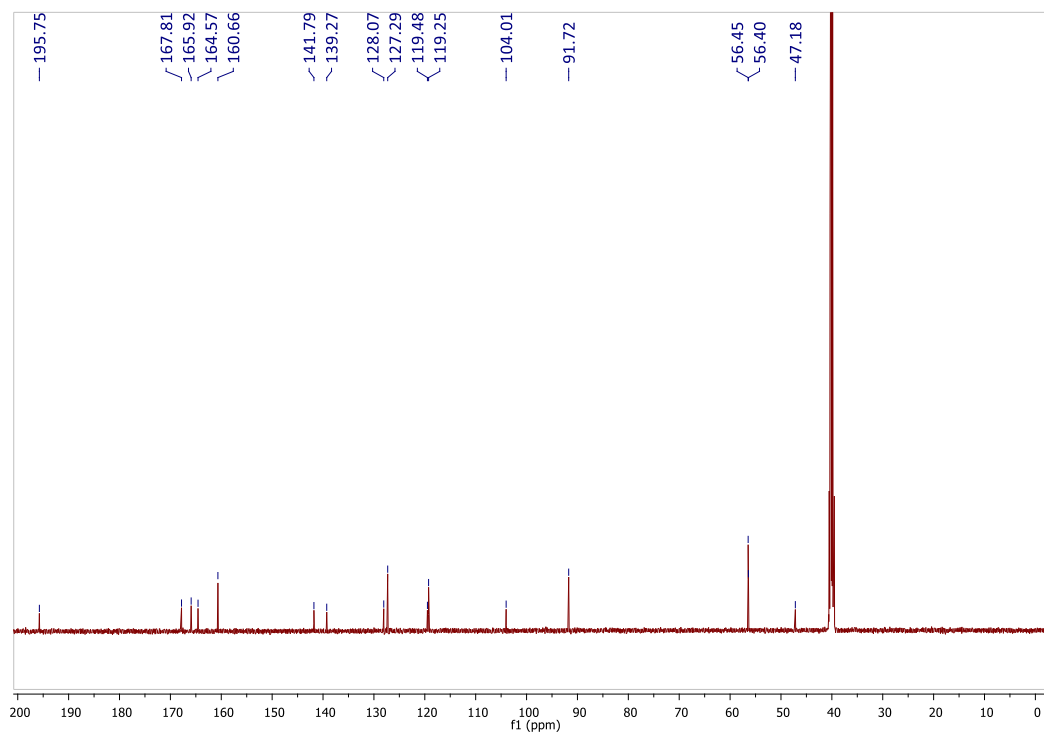

Figure S38. <sup>13</sup>C NMR of **7q** in DMSO-*d*<sub>6</sub>

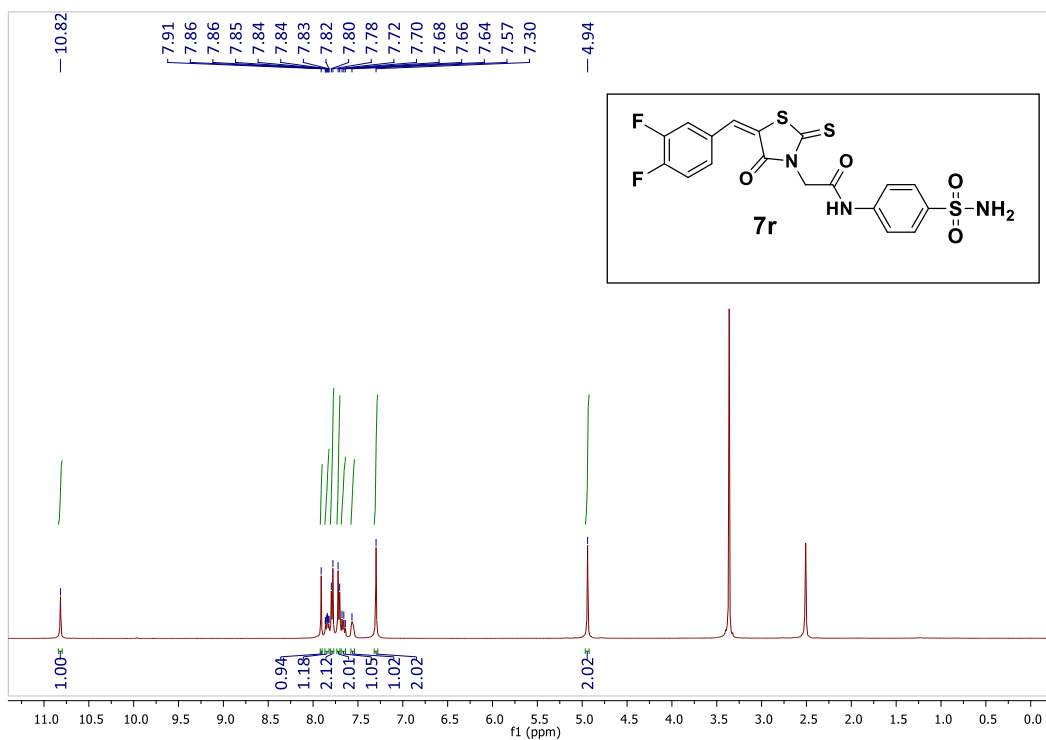

Figure S39. <sup>1</sup>H NMR of **7r** in DMSO-*d*<sub>6</sub>

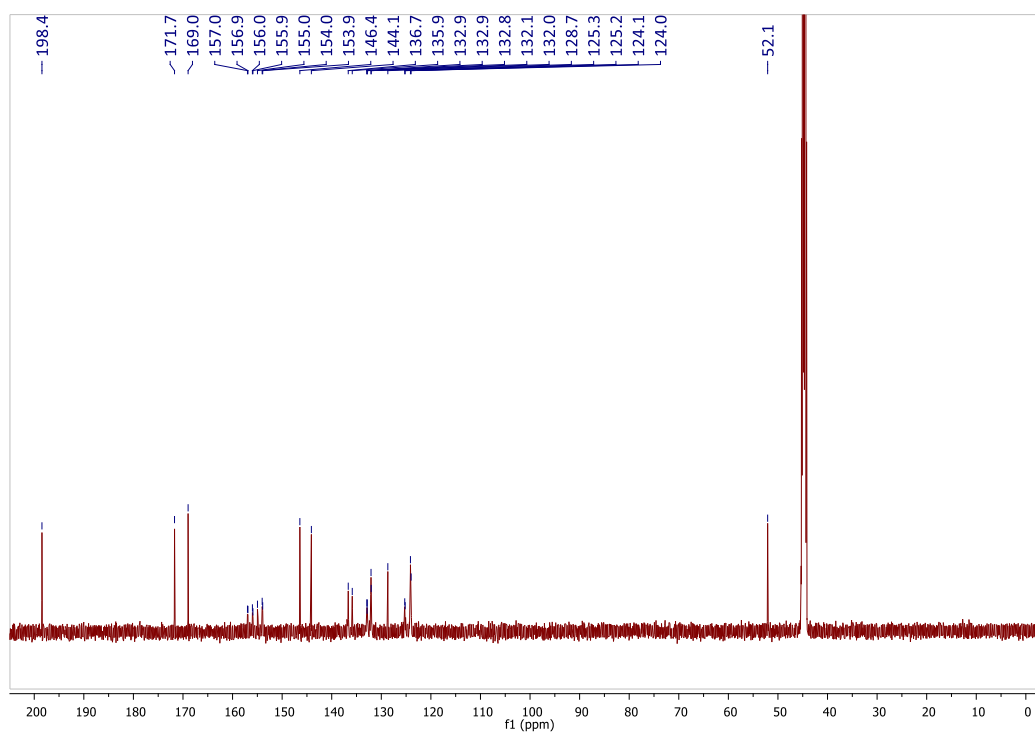

Figure S40. <sup>13</sup>C NMR of **7r** in DMSO-*d*<sub>6</sub>

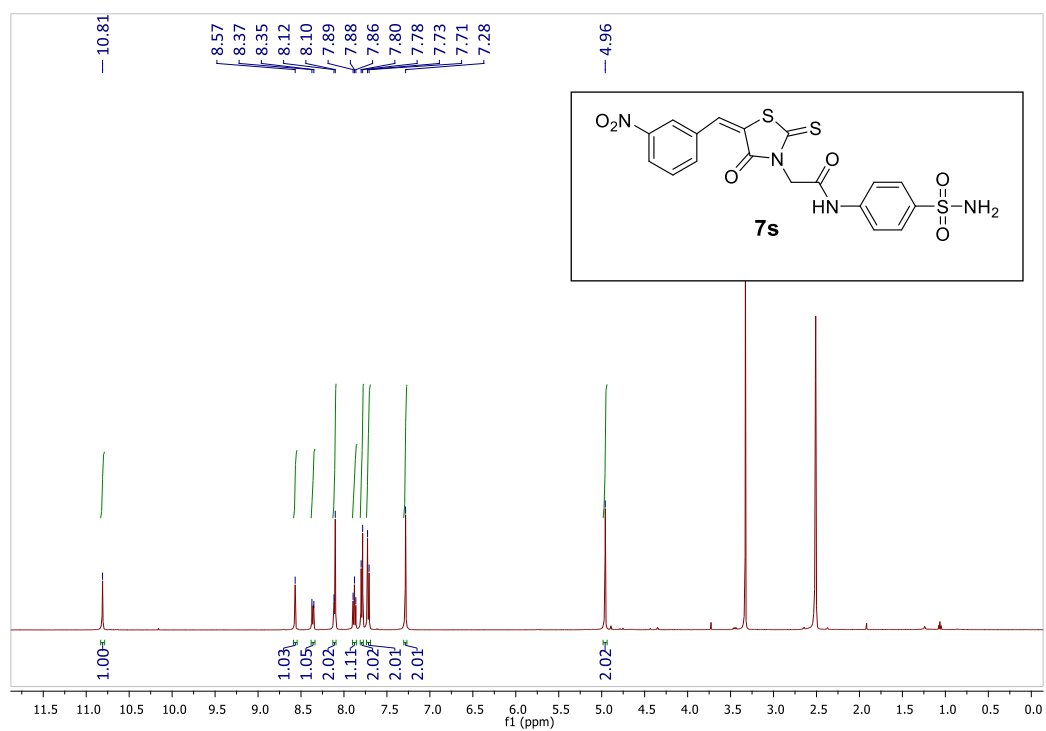

Figure S41. <sup>1</sup>H NMR of **7s** in DMSO-*d*<sub>6</sub>

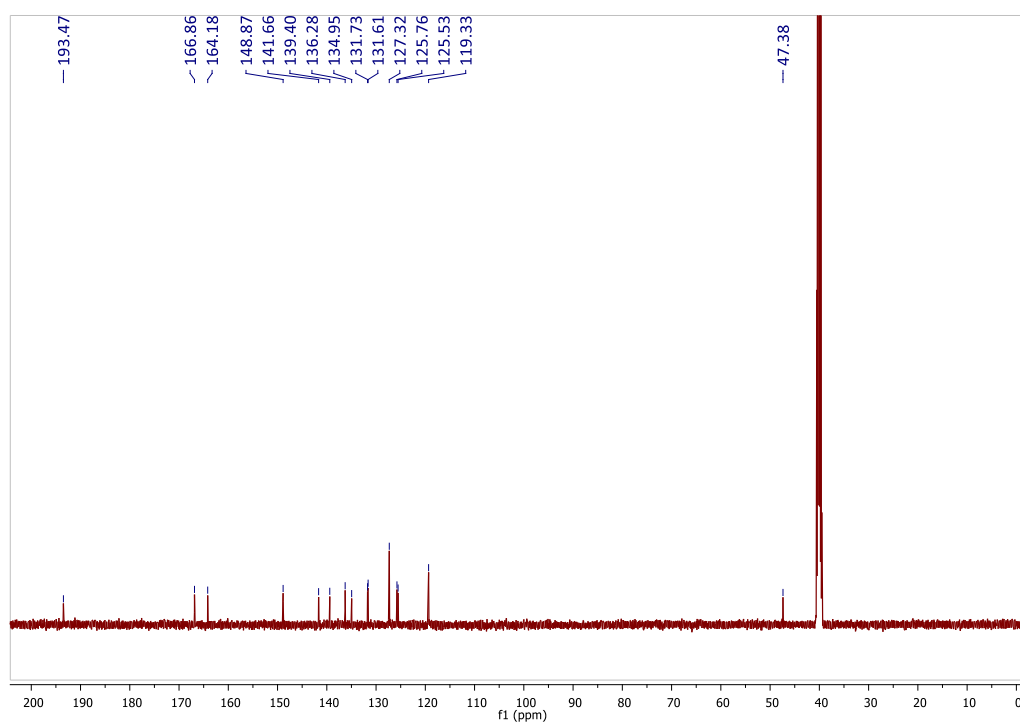

Figure S42. <sup>13</sup>C NMR of **7s** in DMSO-*d*<sub>6</sub>

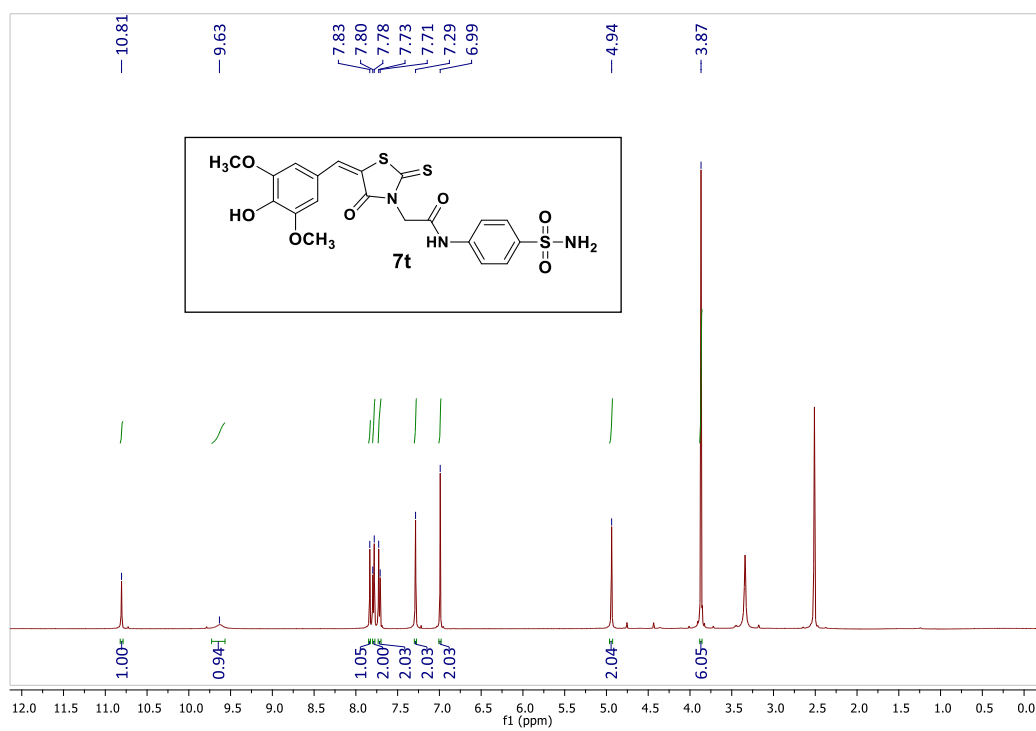

Figure S43. <sup>1</sup>H NMR of **7t** in DMSO-*d*<sub>6</sub>

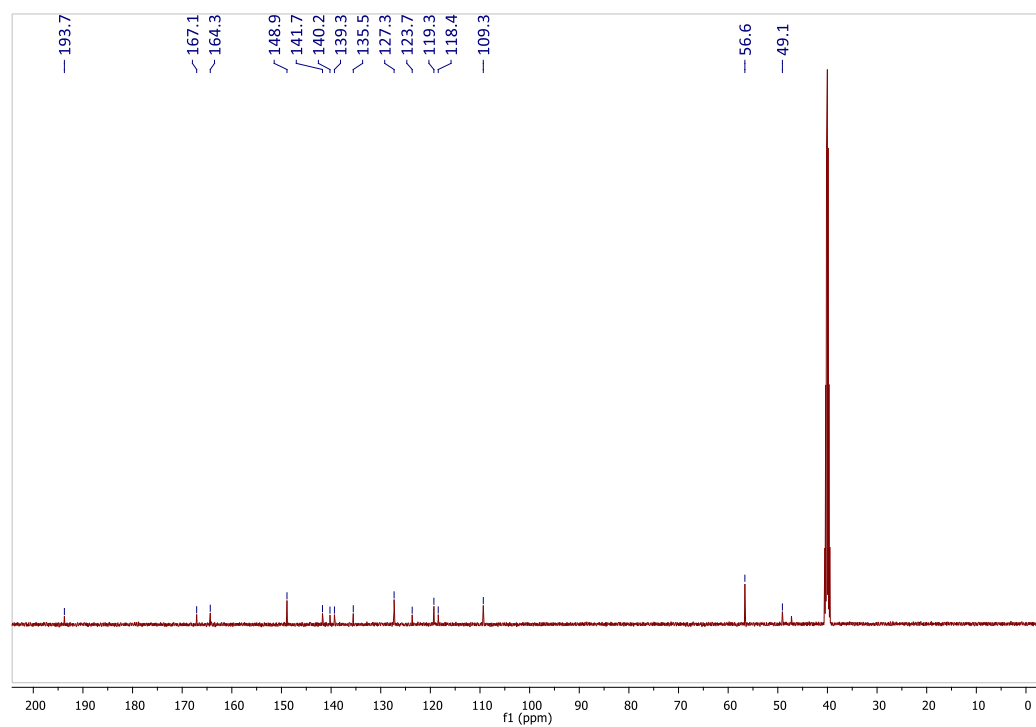

Figure S44. <sup>13</sup>C NMR of **7t** in DMSO-*d*<sub>6</sub>

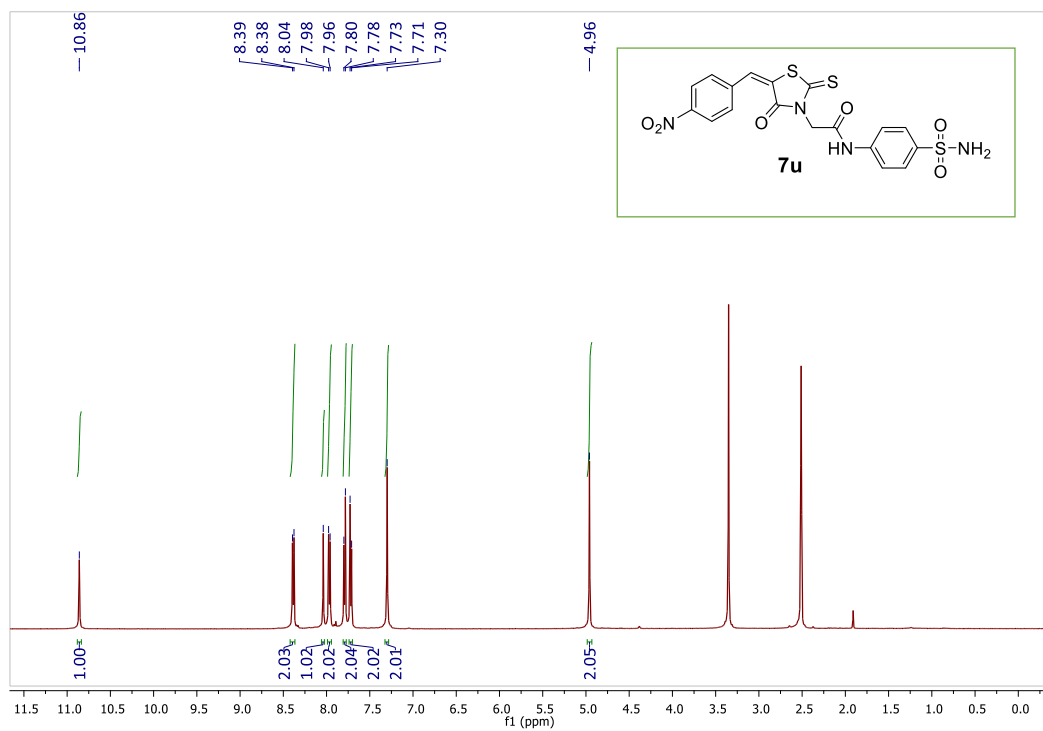

Figure S45. <sup>1</sup>H NMR of **7u** in DMSO-*d*<sub>6</sub>

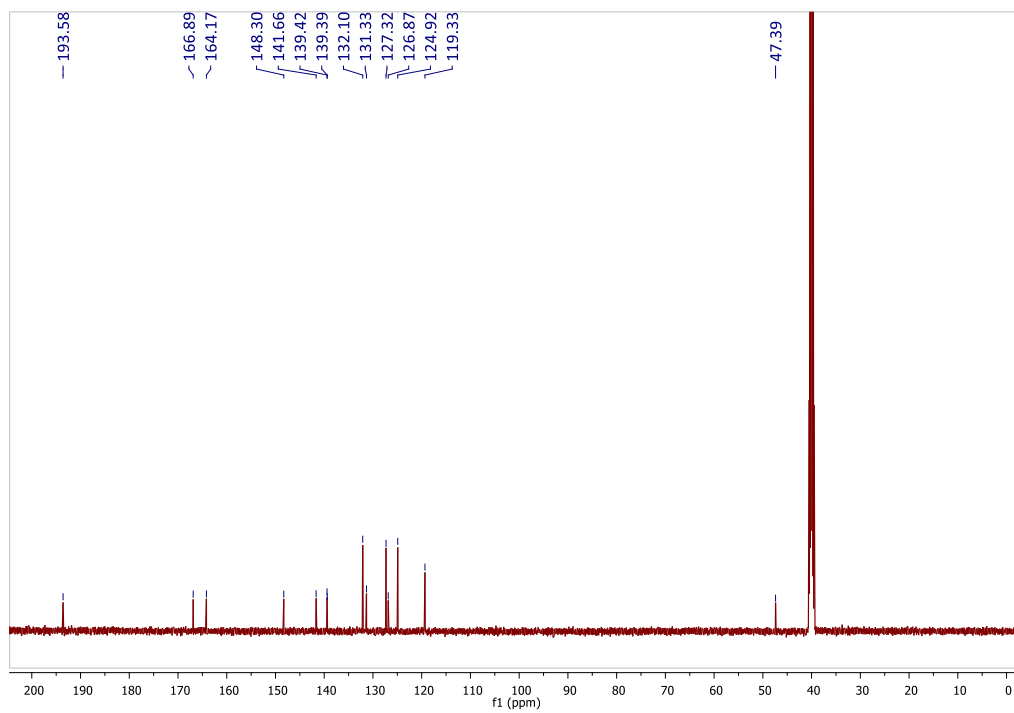

Figure S46. <sup>13</sup>C NMR of **7u** in DMSO-*d*<sub>6</sub>



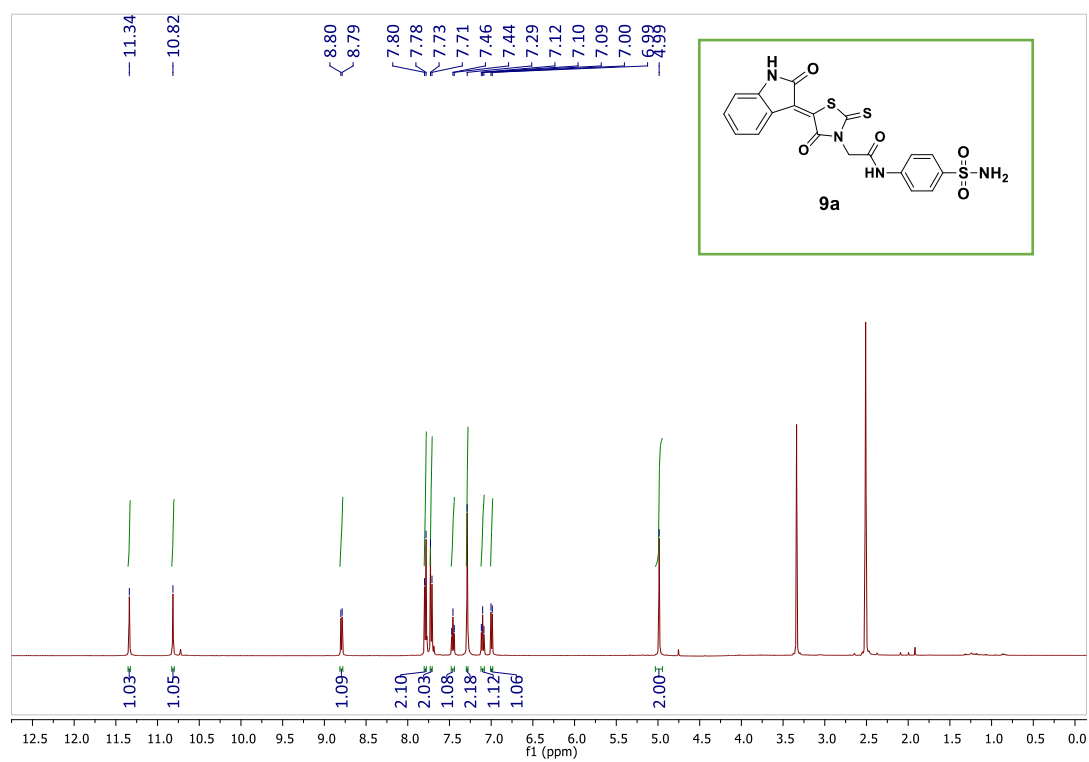

Figure S47. <sup>1</sup>H NMR of **9a** in DMSO-*d*<sub>6</sub>

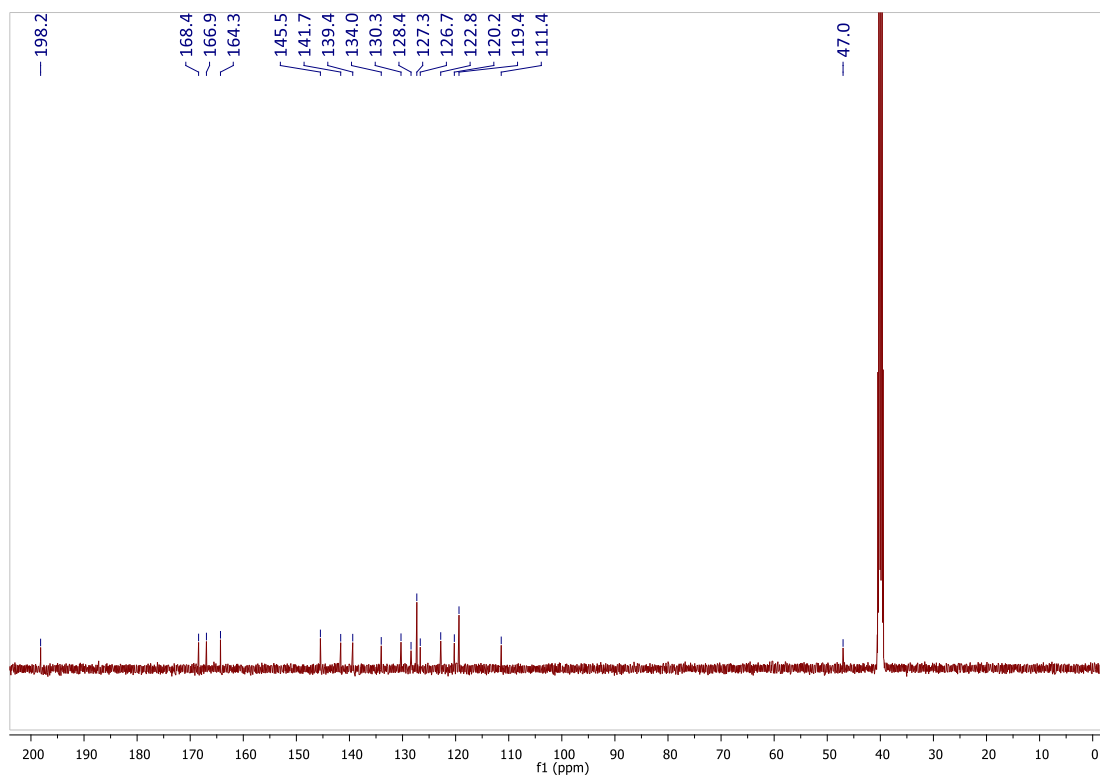

Figure S48. <sup>13</sup>C NMR of **9a** in DMSO-*d*<sub>6</sub>

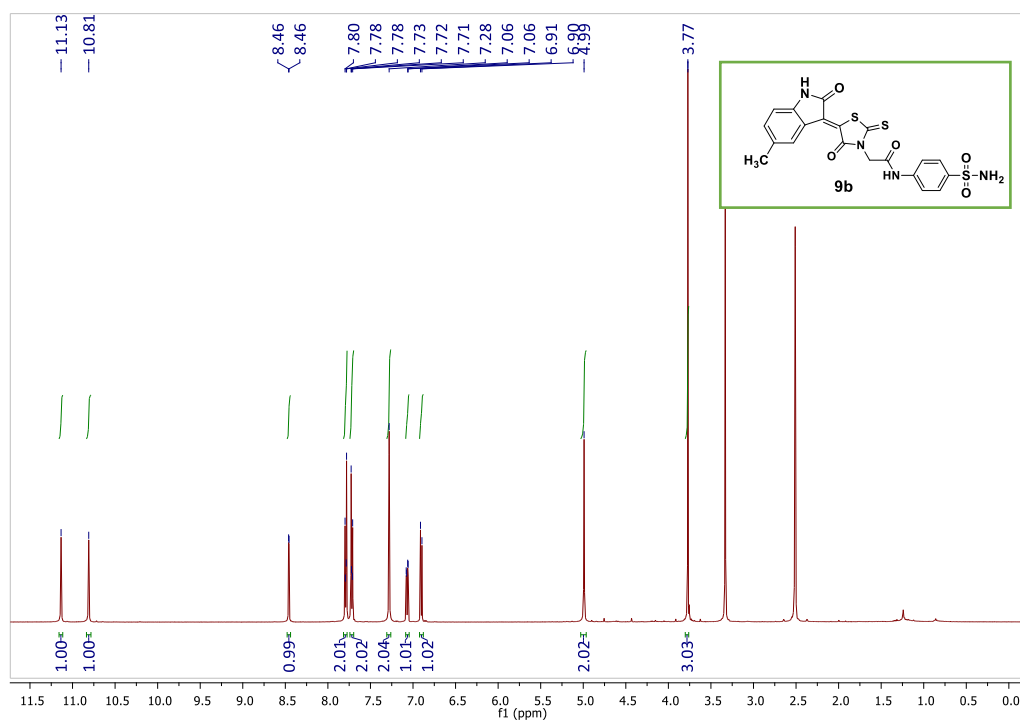

Figure S49. <sup>1</sup>H NMR of **9b** in DMSO-*d*<sub>6</sub>

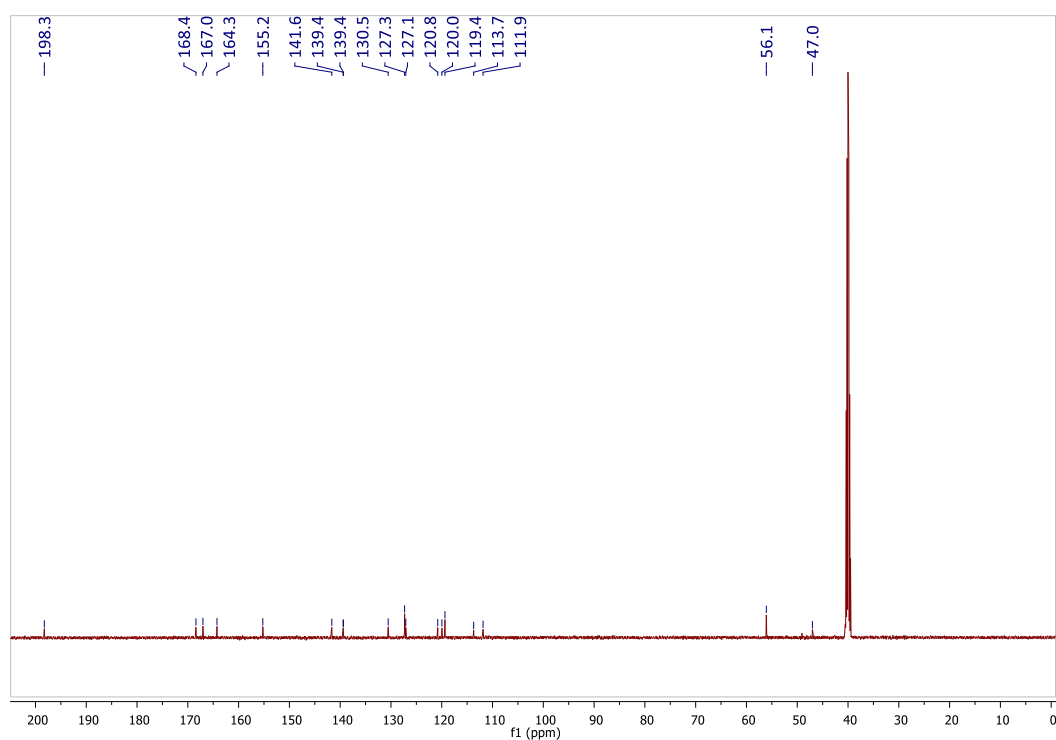

Figure S50. <sup>13</sup>C NMR of **9b** in DMSO-*d*<sub>6</sub>

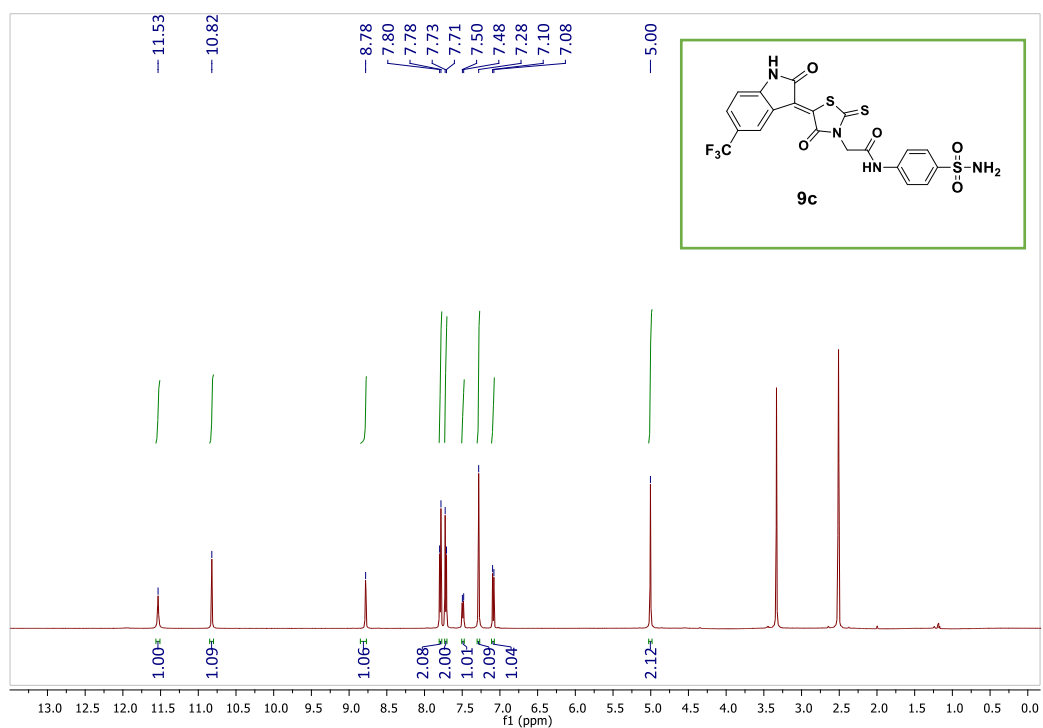

Figure S51. <sup>1</sup>H NMR of **9c** in DMSO-*d*<sub>6</sub>

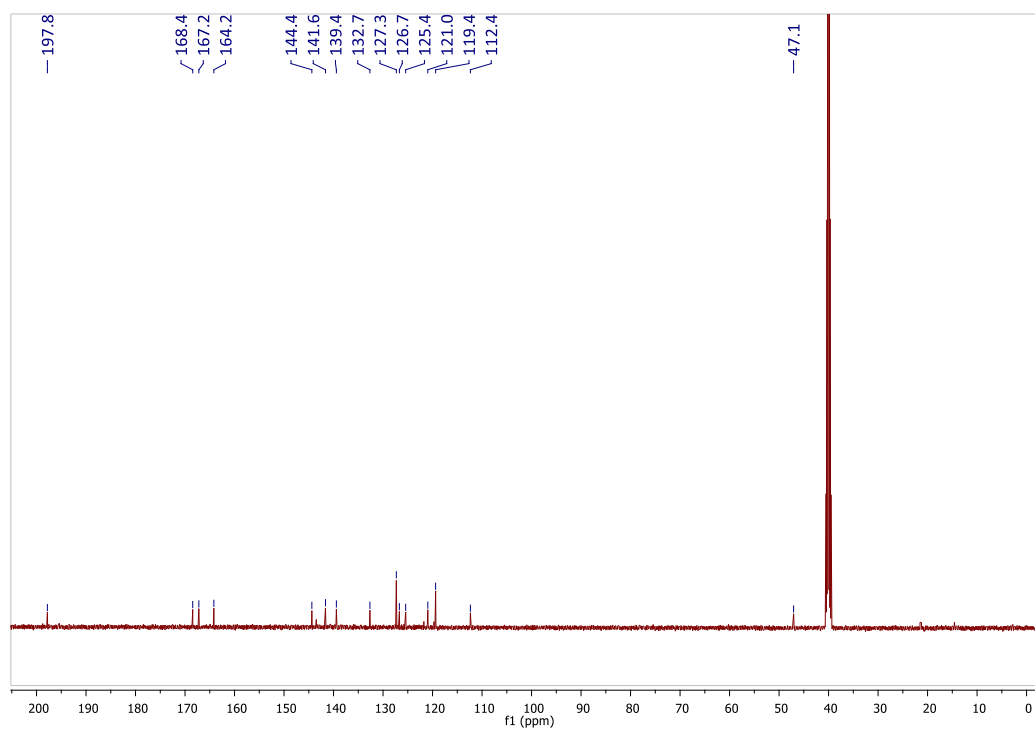

Figure S52. <sup>13</sup>C NMR of **9c** in DMSO-*d*<sub>6</sub>

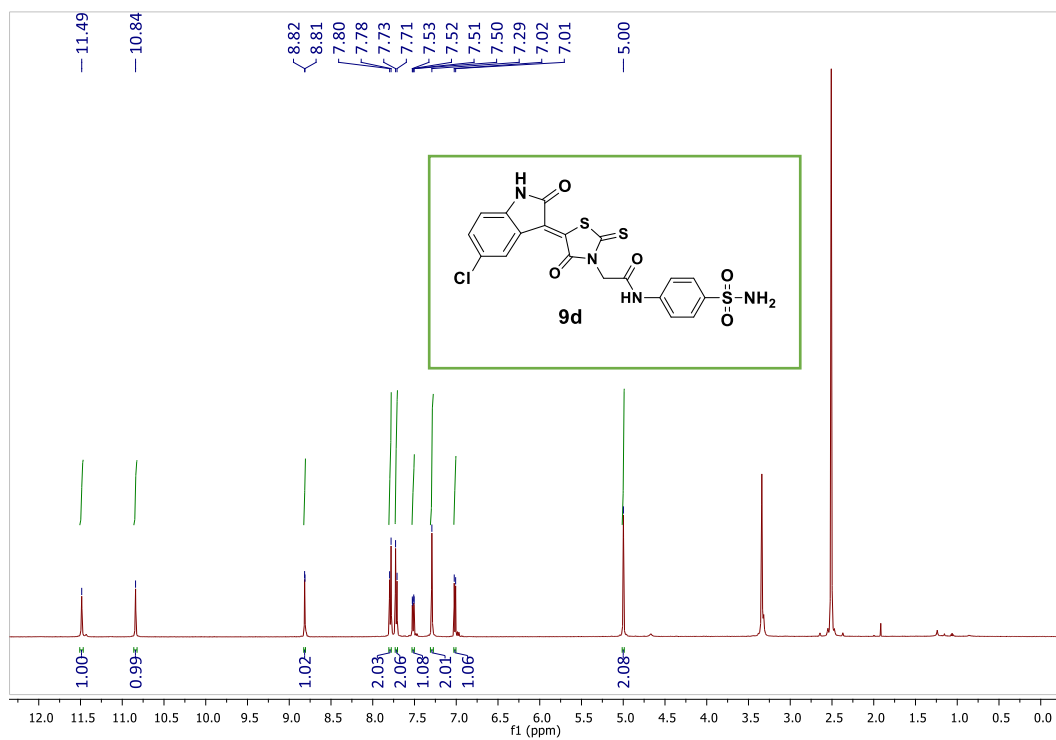

Figure S53. <sup>1</sup>H NMR of **9d** in DMSO-*d*<sub>6</sub>

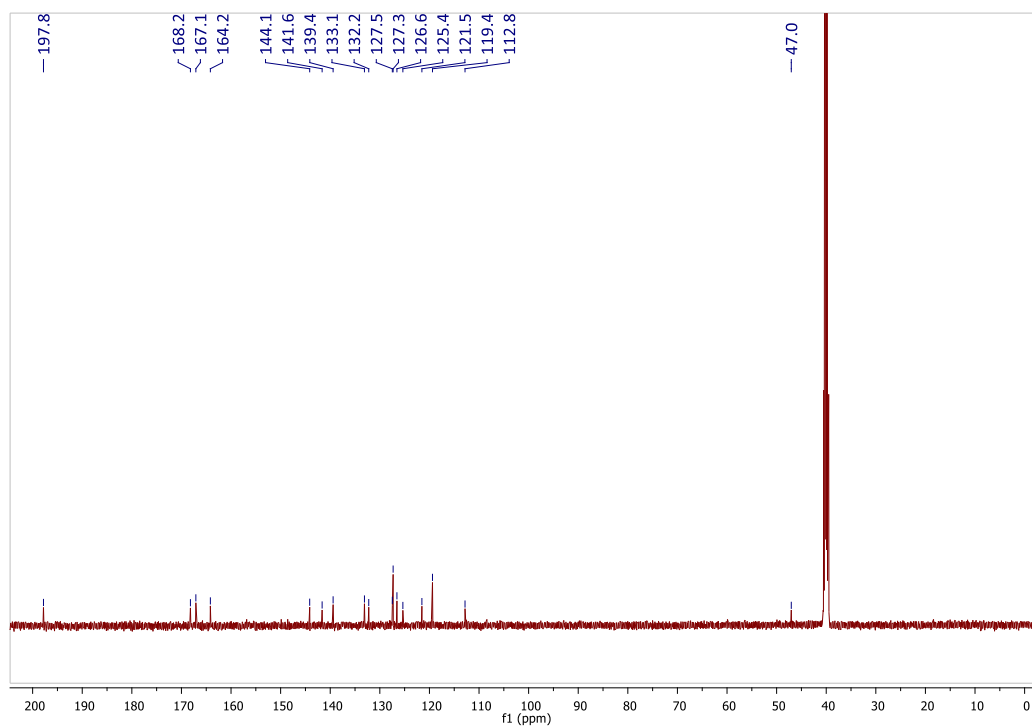

Figure S54. <sup>13</sup>C NMR of **9d** in DMSO-*d*<sub>6</sub>
